# Supplementary material for: Substituted 1,3,5-Triazine Hexacarboxylates as Potential Linkers for MOFs
Source: PubMed Central journal article supplement (PMC6804050; doi:10.3390/molecules24193480), 2019-09-25
Supplement: molecules-24-03480-s001.pdf [file molecules-24-03480-s001.pdf]

## Substituted triazine hexacarboxylates as linkers for MOFs

Arne Klinkebiel, Ole Beyer, Ulrich Lüning\*

\* Otto-Diels-Institut für Organische Chemie, Christian-Albrechts-Universität zu Kiel,  
Olshausenstr. 40, D-24098 Kiel, Germany

Supporting information: NMR spectra for

|            |       |
|------------|-------|
| <b>6a</b>  | p. 2  |
| <b>6b</b>  | p. 4  |
| <b>6c</b>  | p. 6  |
| <b>7a</b>  | p. 8  |
| <b>7b</b>  | p. 10 |
| <b>7c</b>  | p. 12 |
| <b>9a</b>  | p. 14 |
| <b>9b</b>  | p. 16 |
| <b>9c</b>  | p. 18 |
| <b>10a</b> | p. 20 |
| <b>10c</b> | p. 22 |
| <b>11a</b> | p. 24 |
| <b>11c</b> | p. 26 |

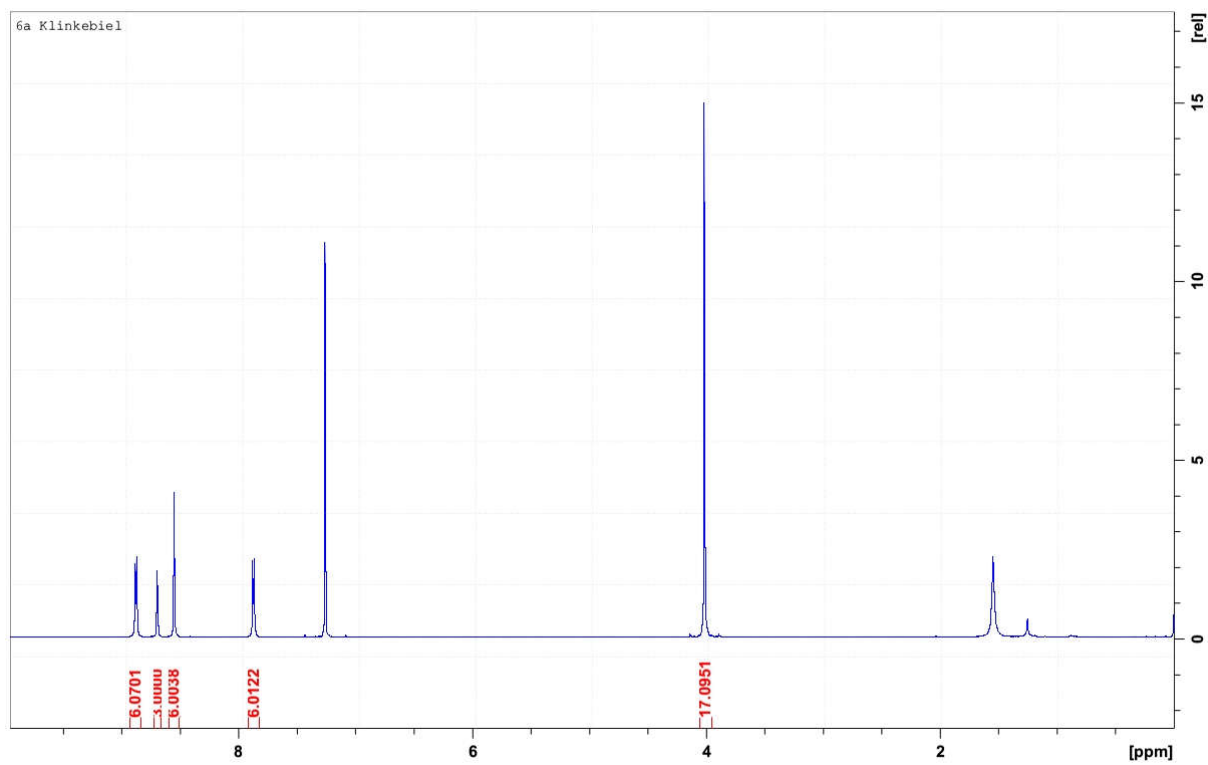

Figure S1. <sup>1</sup>H NMR spectrum of **6a**.

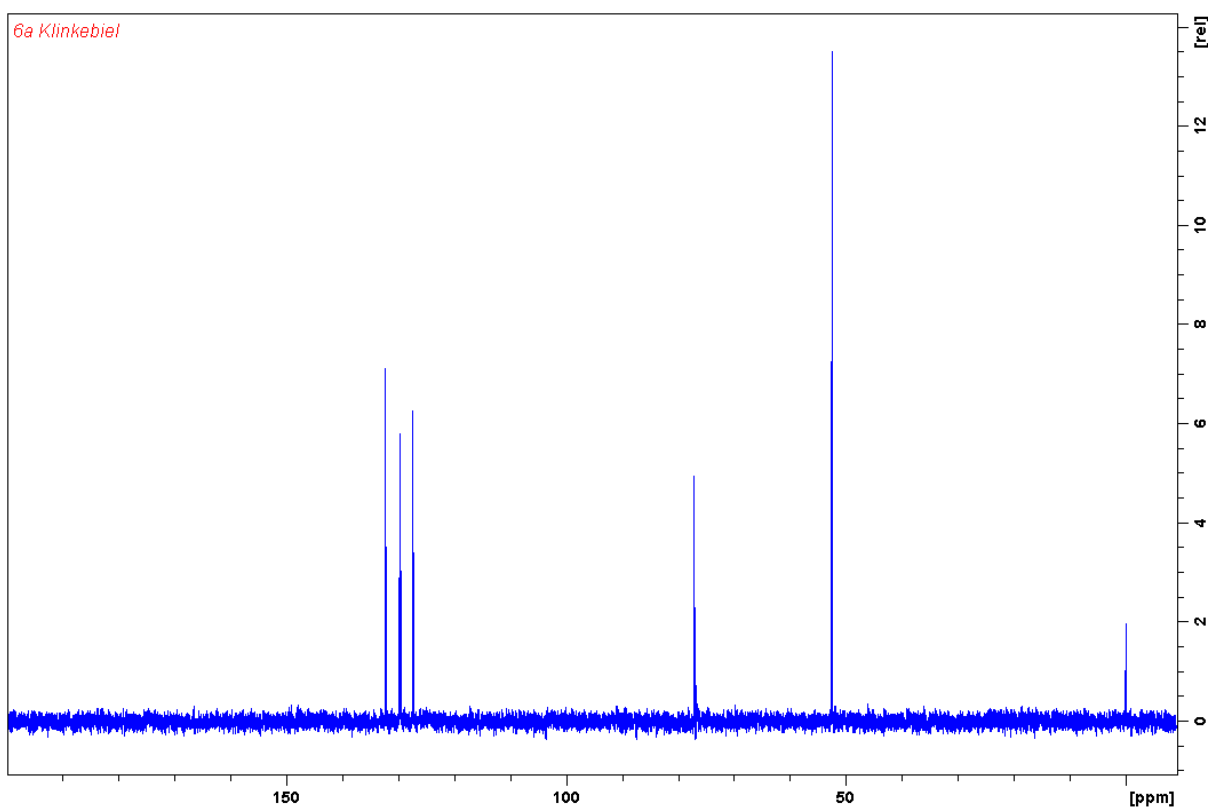

Figure S2. <sup>13</sup>C NMR spectrum of **6a**.

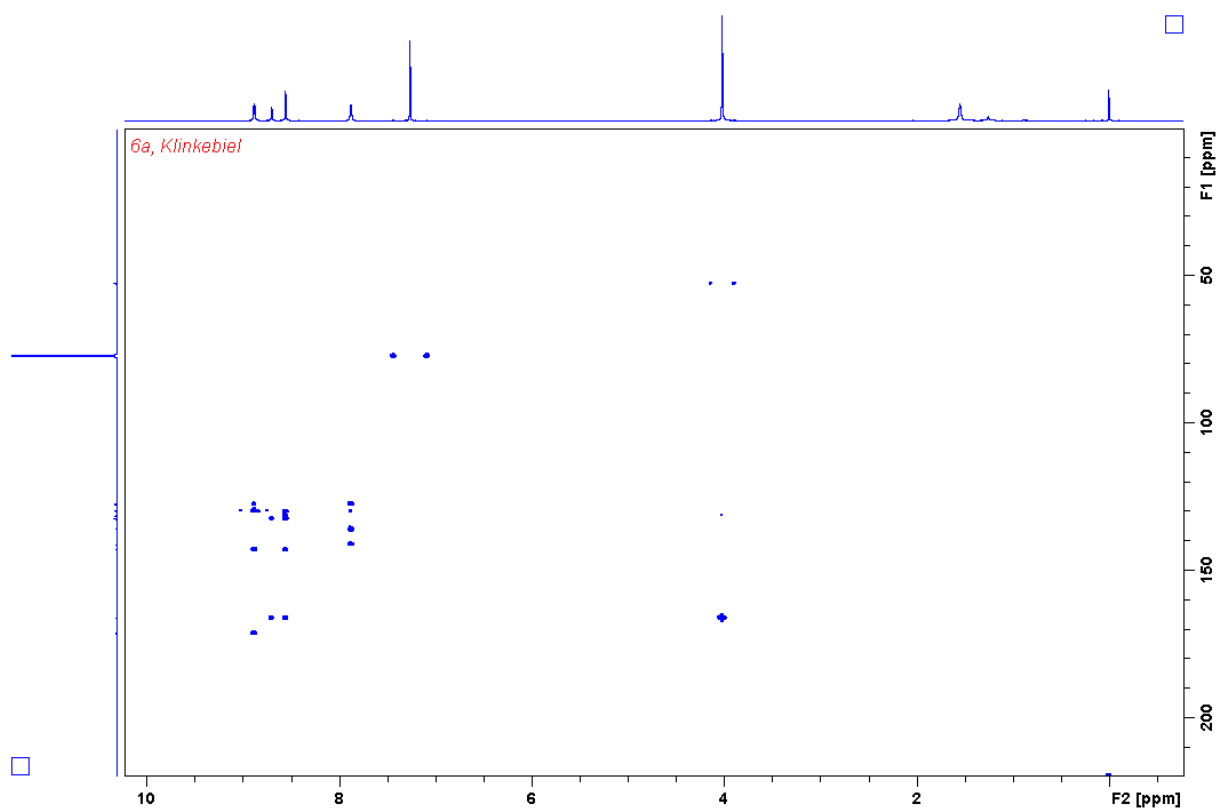

Figure S3. HMBC NMR spectrum of **6a**.

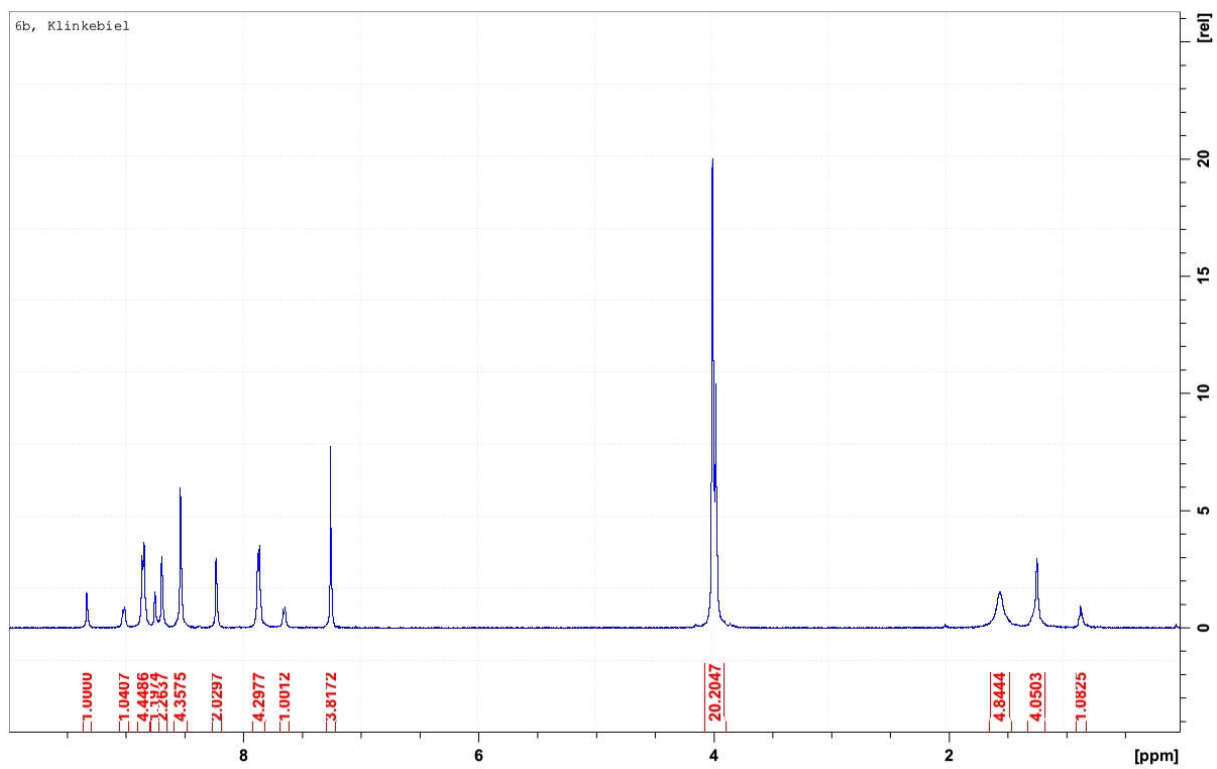

Figure S4.  $^1\text{H}$  NMR spectrum of **6b**.

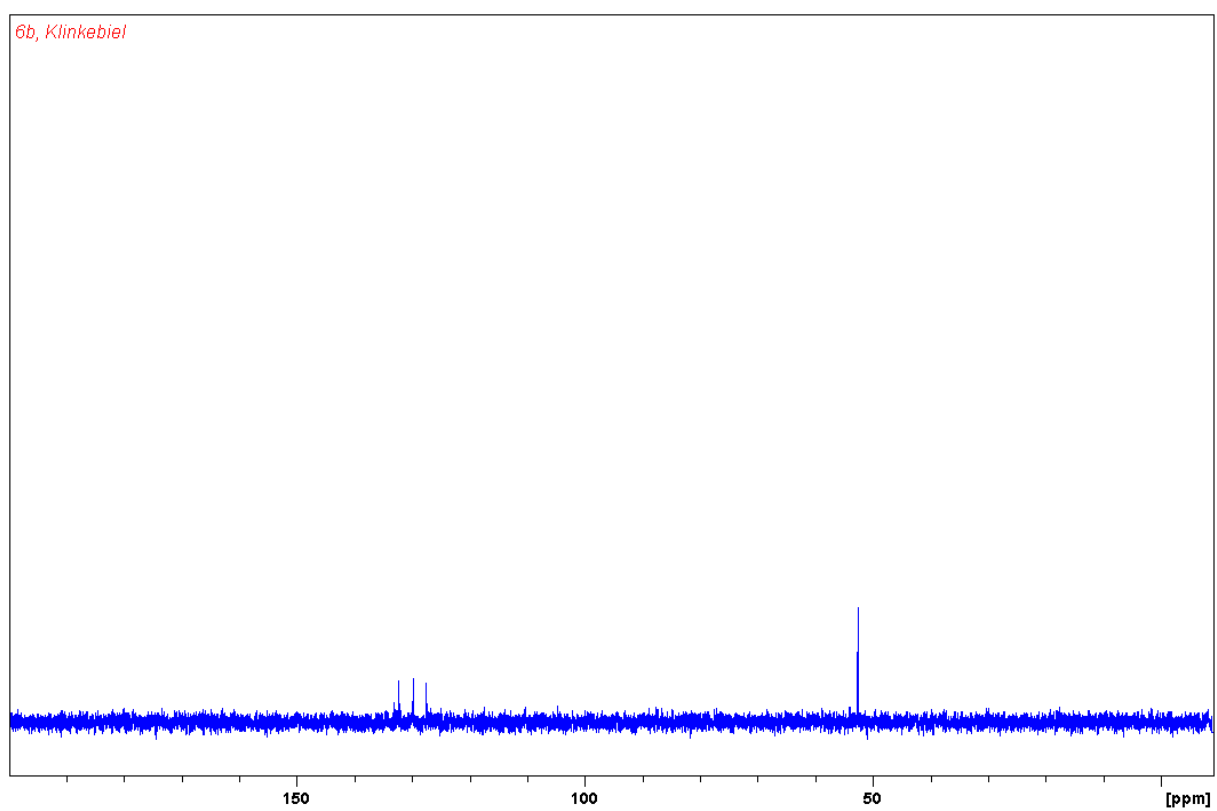

Figure S5.  $^{13}\text{C}$  NMR spectrum of **6b**.

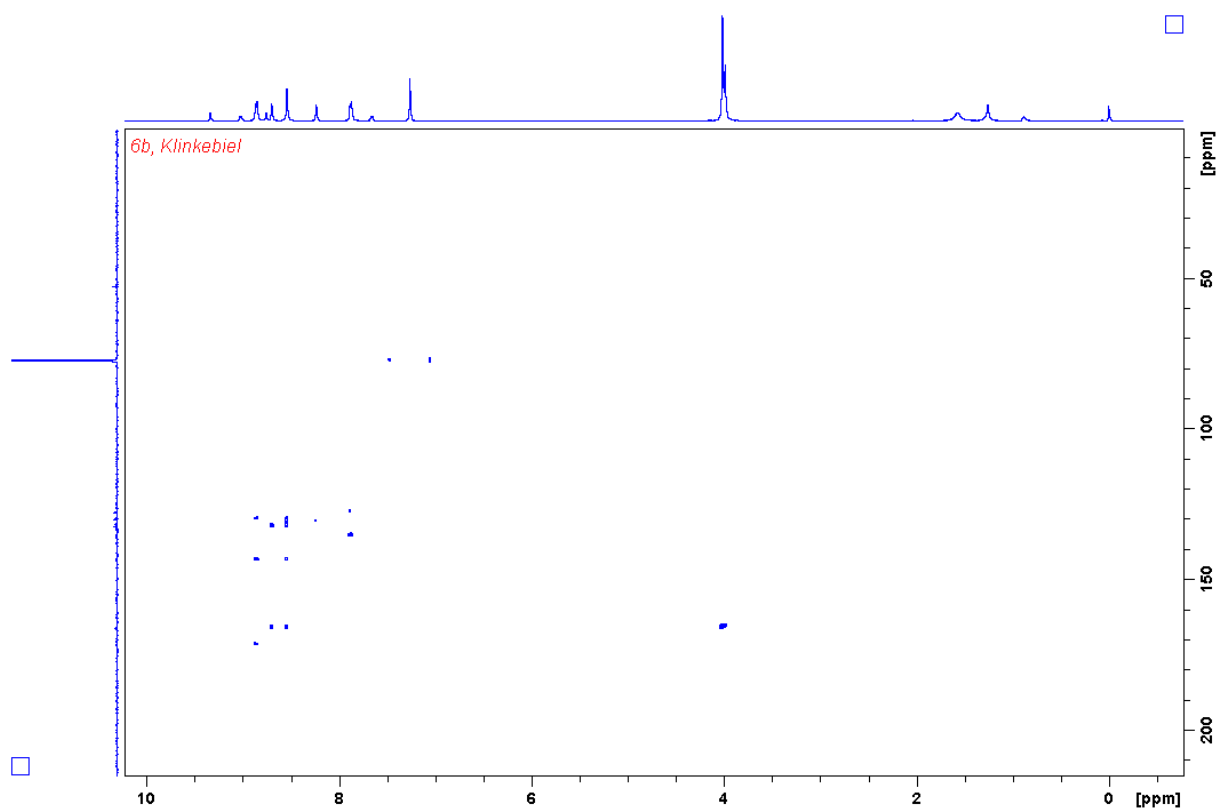

Figure S6. HMBC NMR spectrum of **6b**.

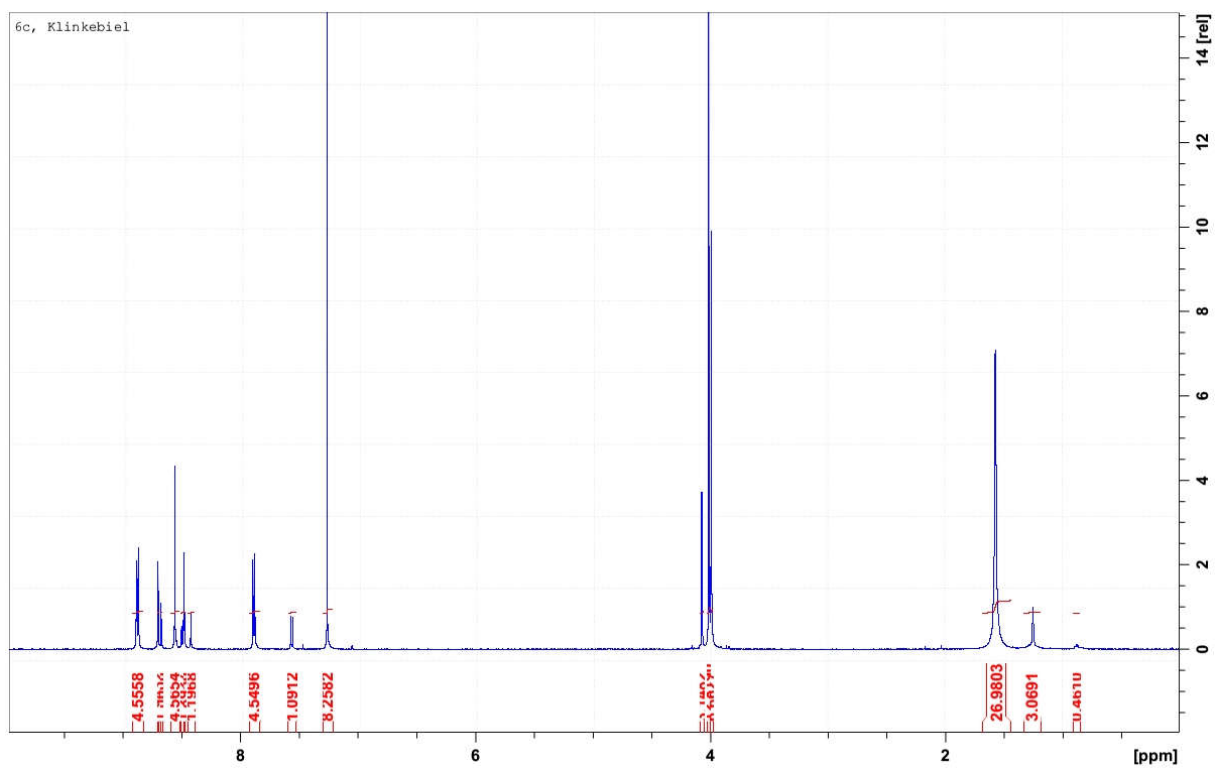

Figure S7. <sup>1</sup>H NMR spectrum of **6c**.

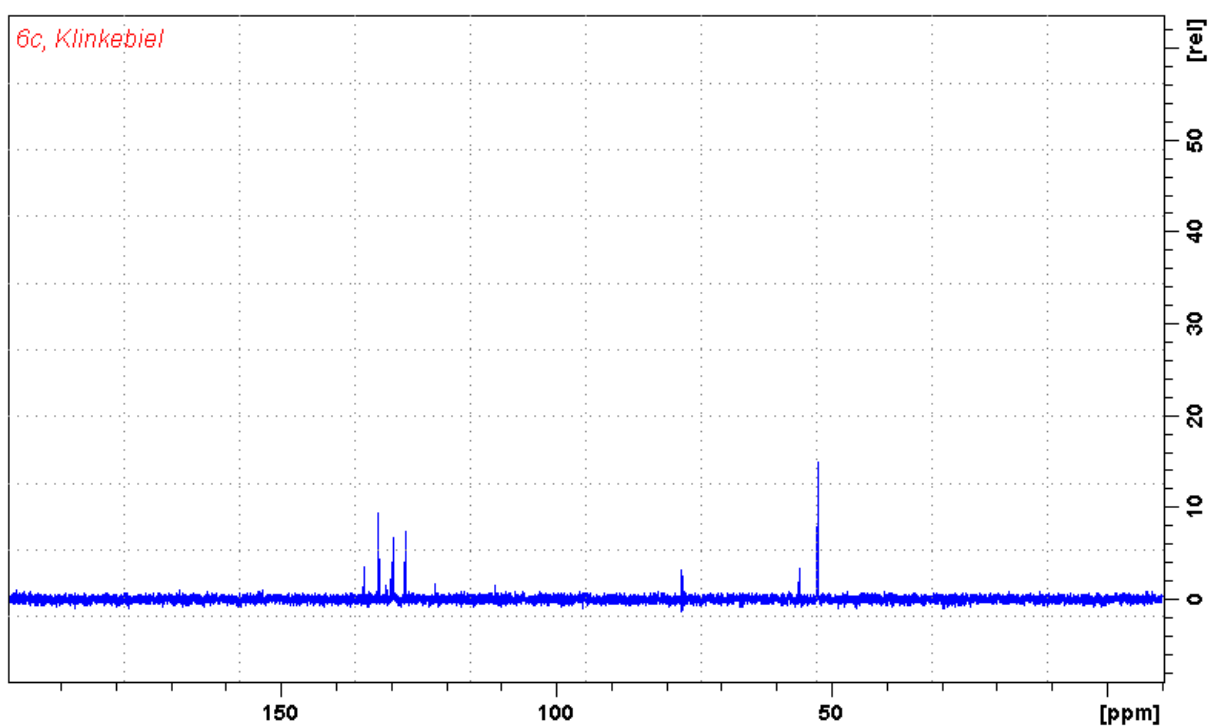

Figure S8. <sup>13</sup>C NMR spectrum of **6c**.

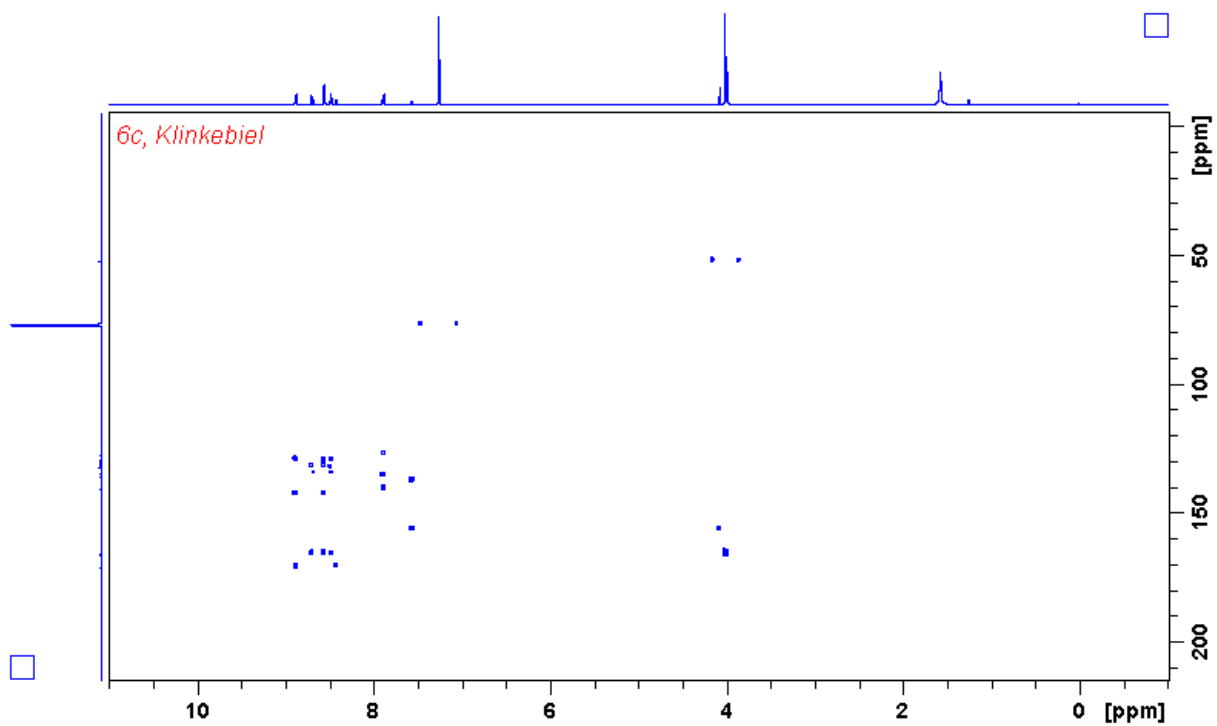

Figure S9. HMBC NMR spectrum of **6c**.

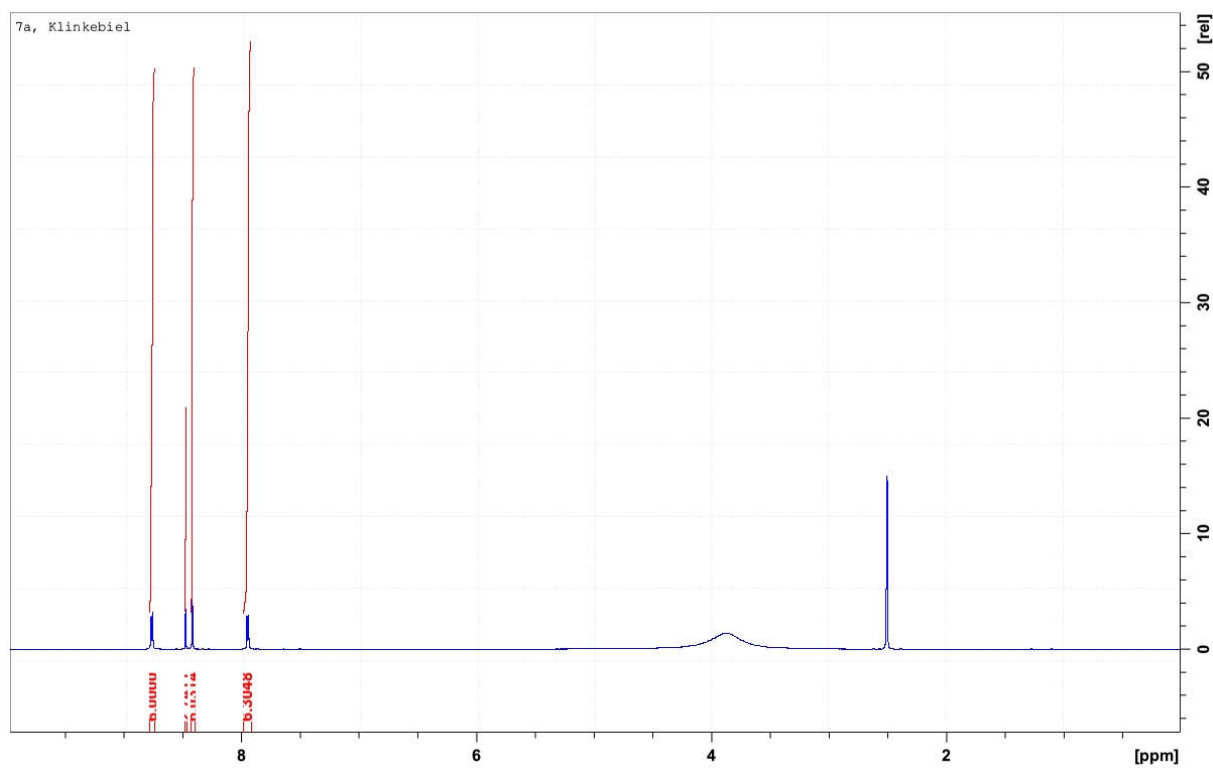

Figure S10. <sup>1</sup>H NMR spectrum of **7a**.

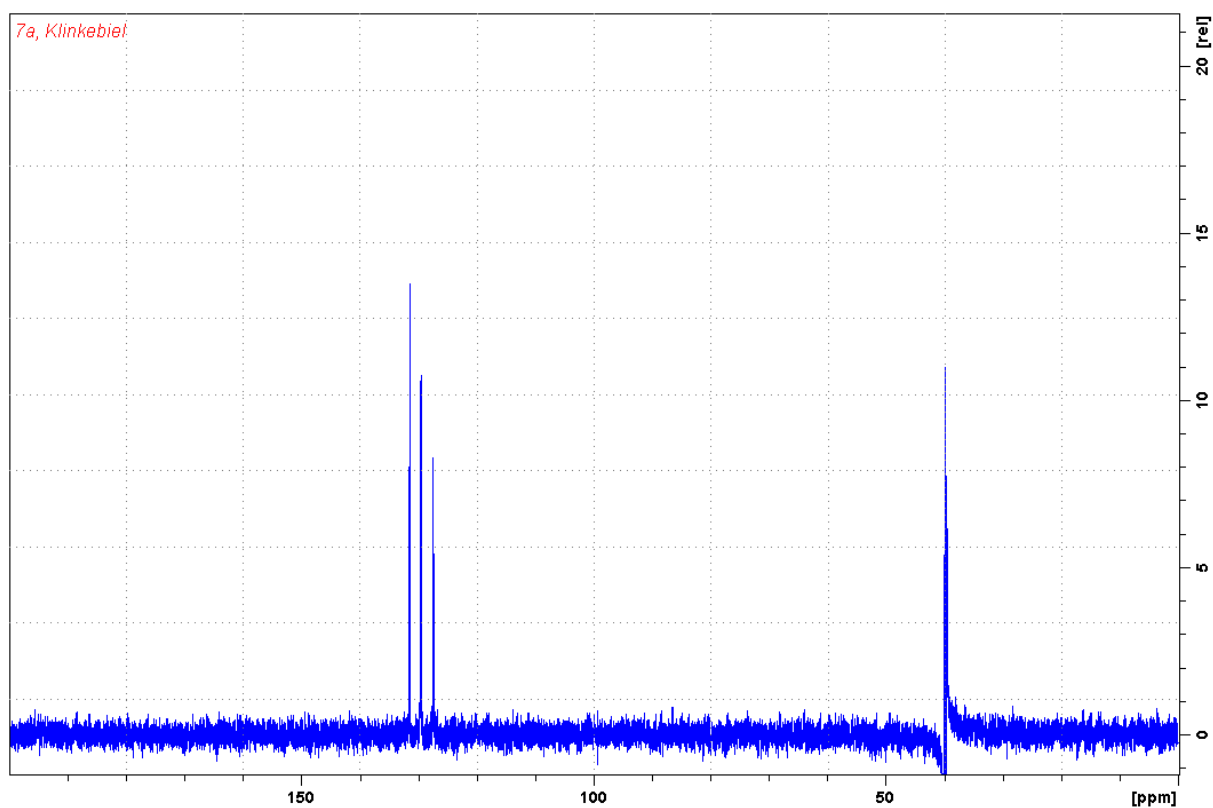

Figure S11. <sup>13</sup>C NMR spectrum of **7a**.



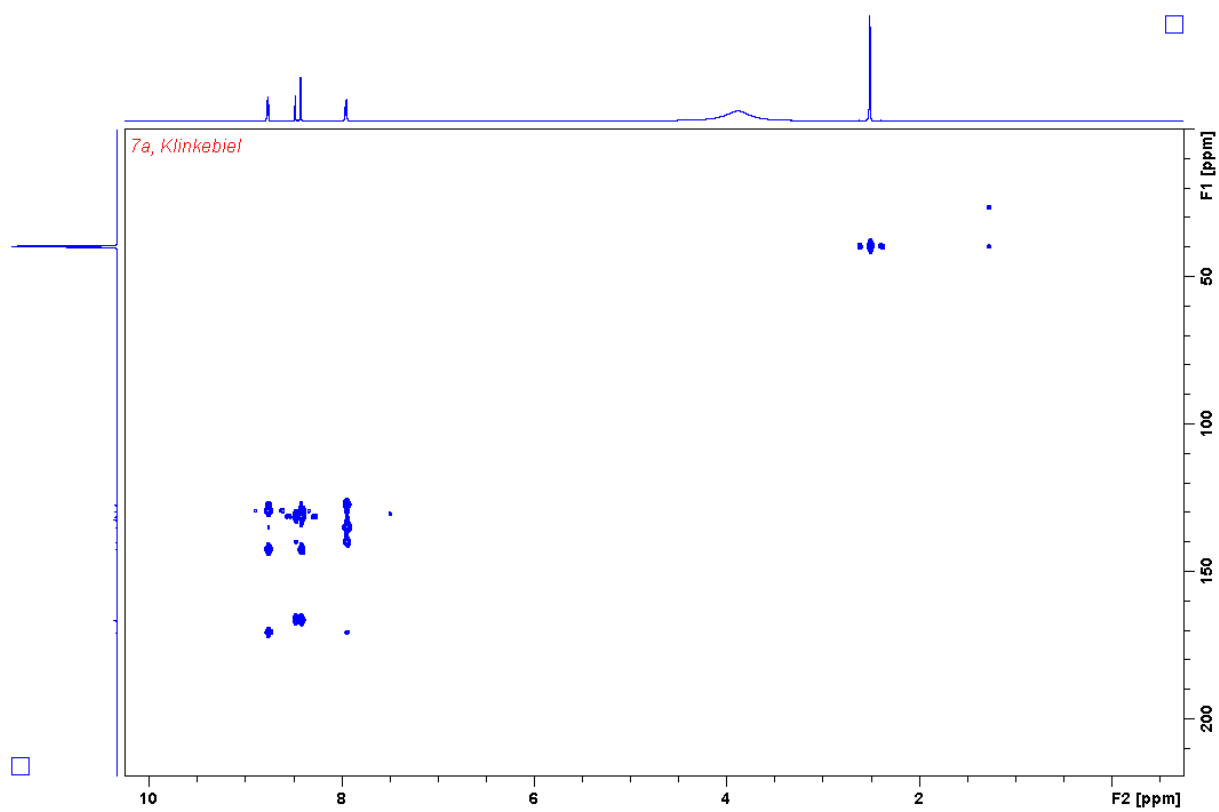

Figure S12. HMBC NMR spectrum of **7a**.

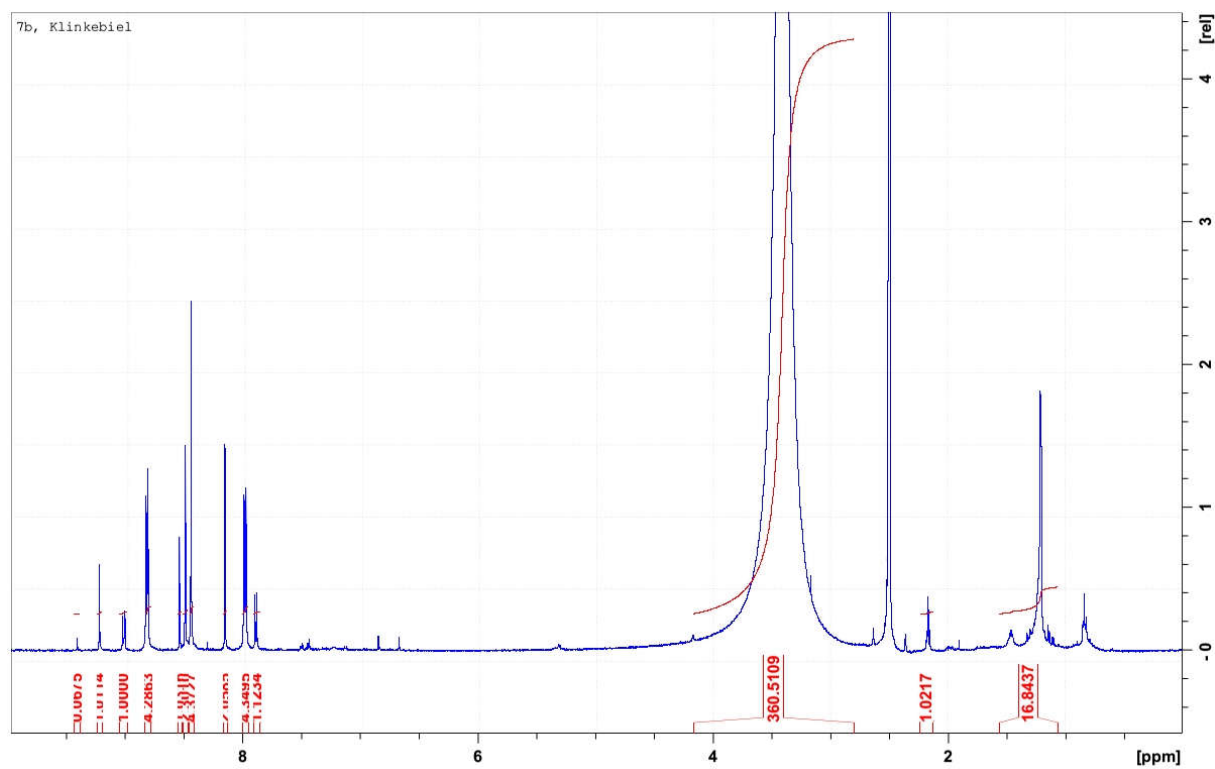

Figure S13.  $^1\text{H}$  NMR spectrum of **7b**.

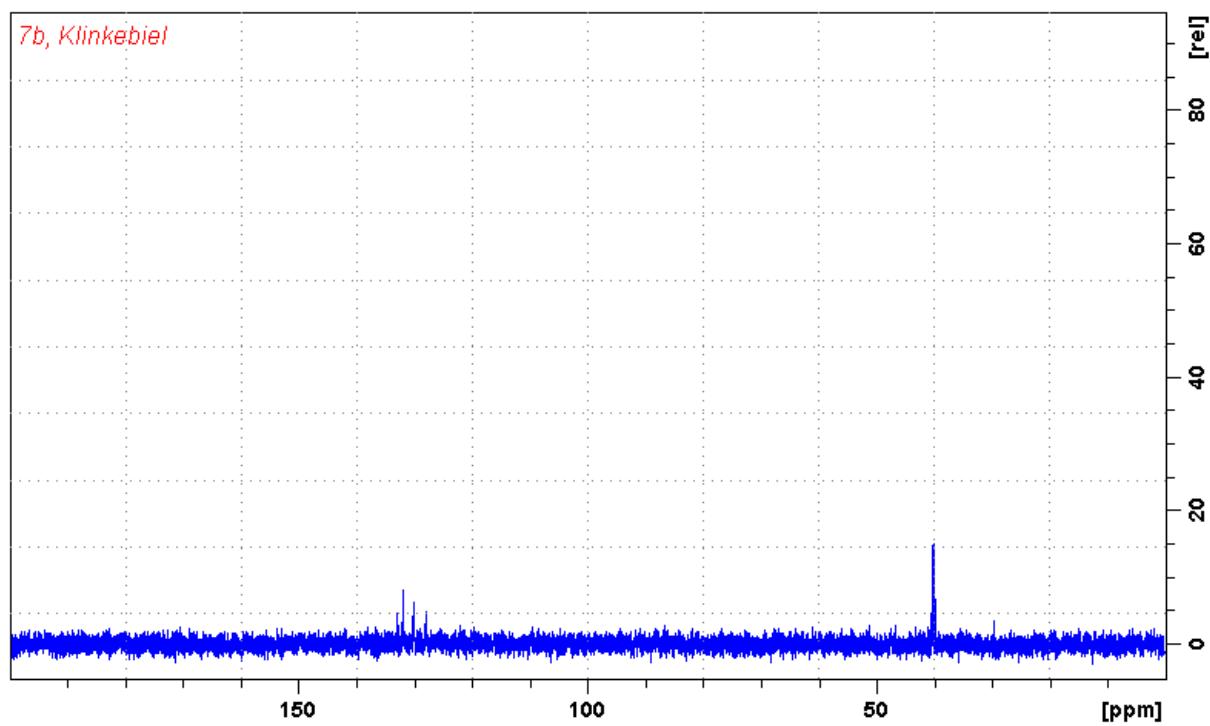

Figure S14.  $^{13}\text{C}$  NMR spectrum of **7b**.

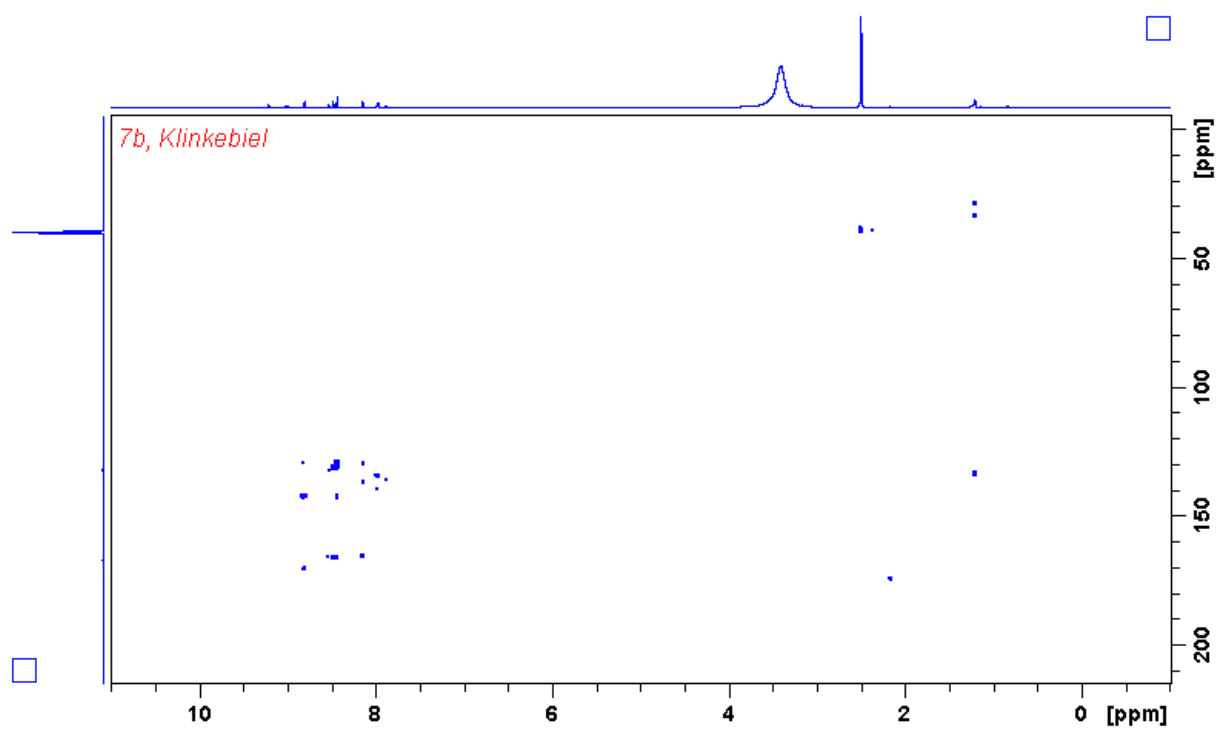

Figure S15. HMBC NMR spectrum of **7b**.

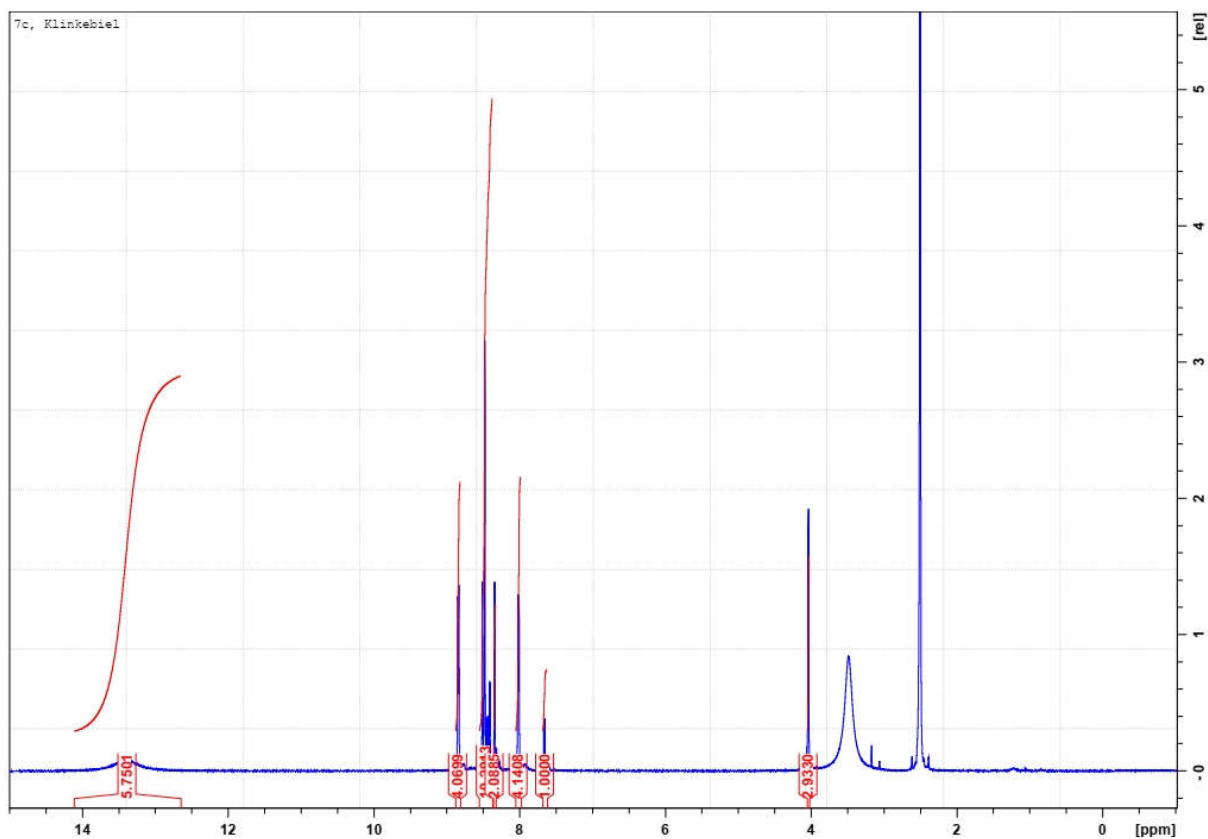

Figure S16.  $^1\text{H}$  NMR spectrum of **7c**.

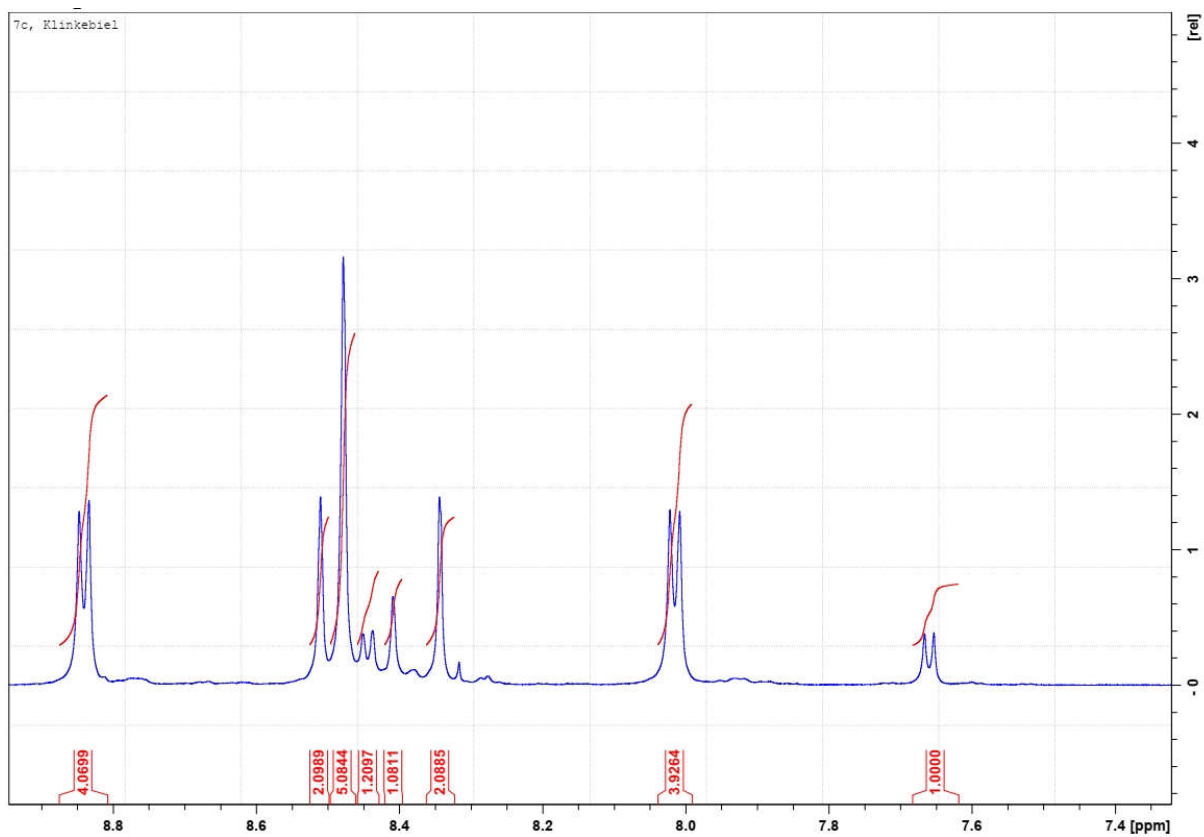

Figure S16a. Aromatic part of  $^1\text{H}$  NMR spectrum of **7c**.

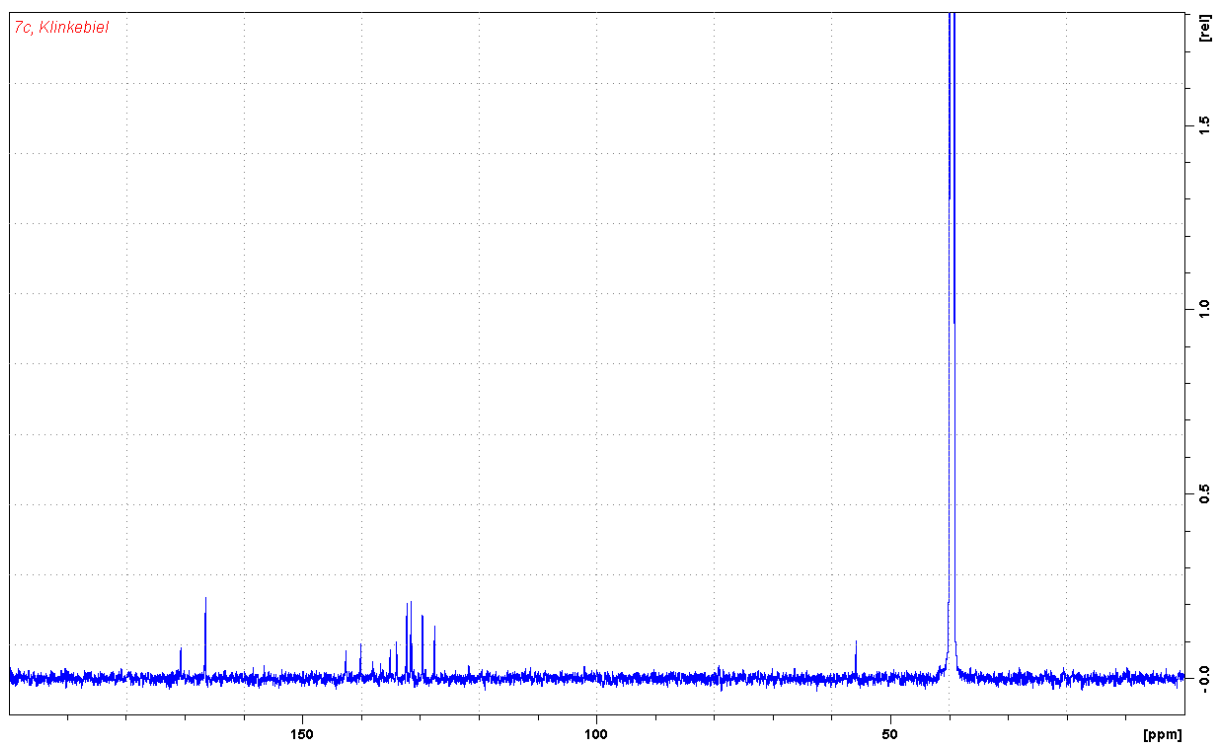

Figure S17.  $^{13}\text{C}$  NMR spectrum of **7c**.

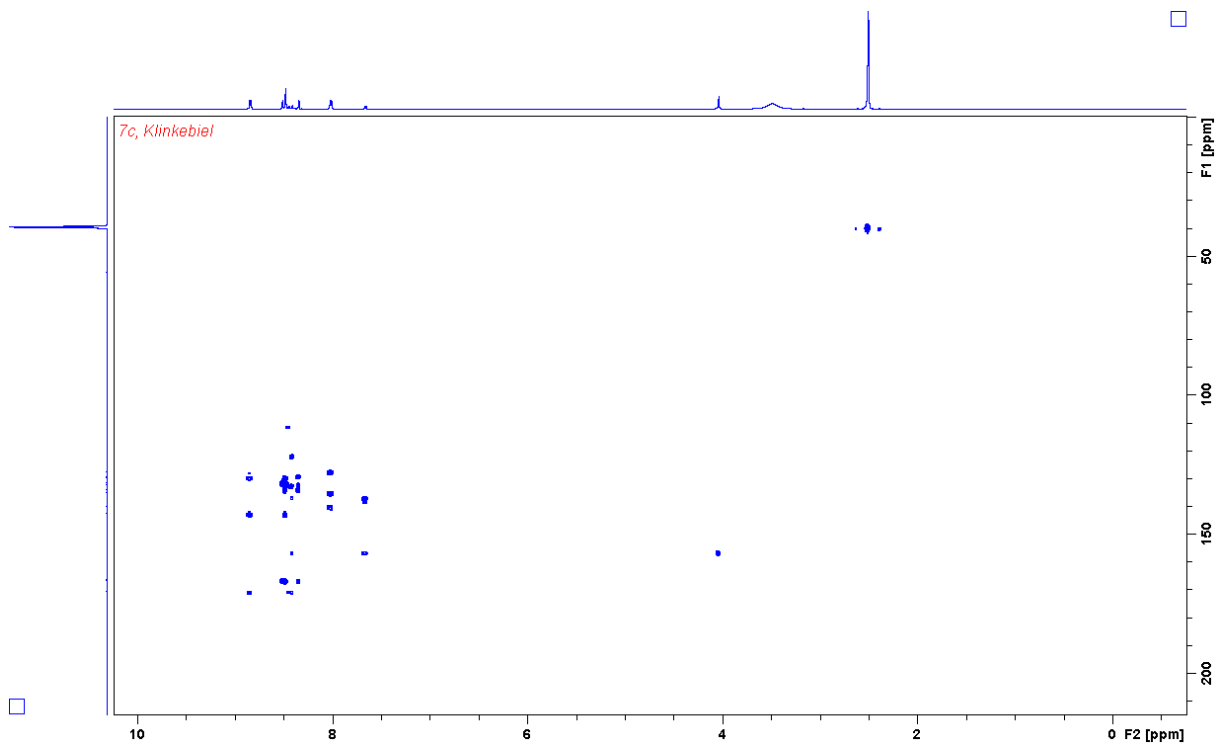

Figure S18. HMBC NMR spectrum of **7c**.

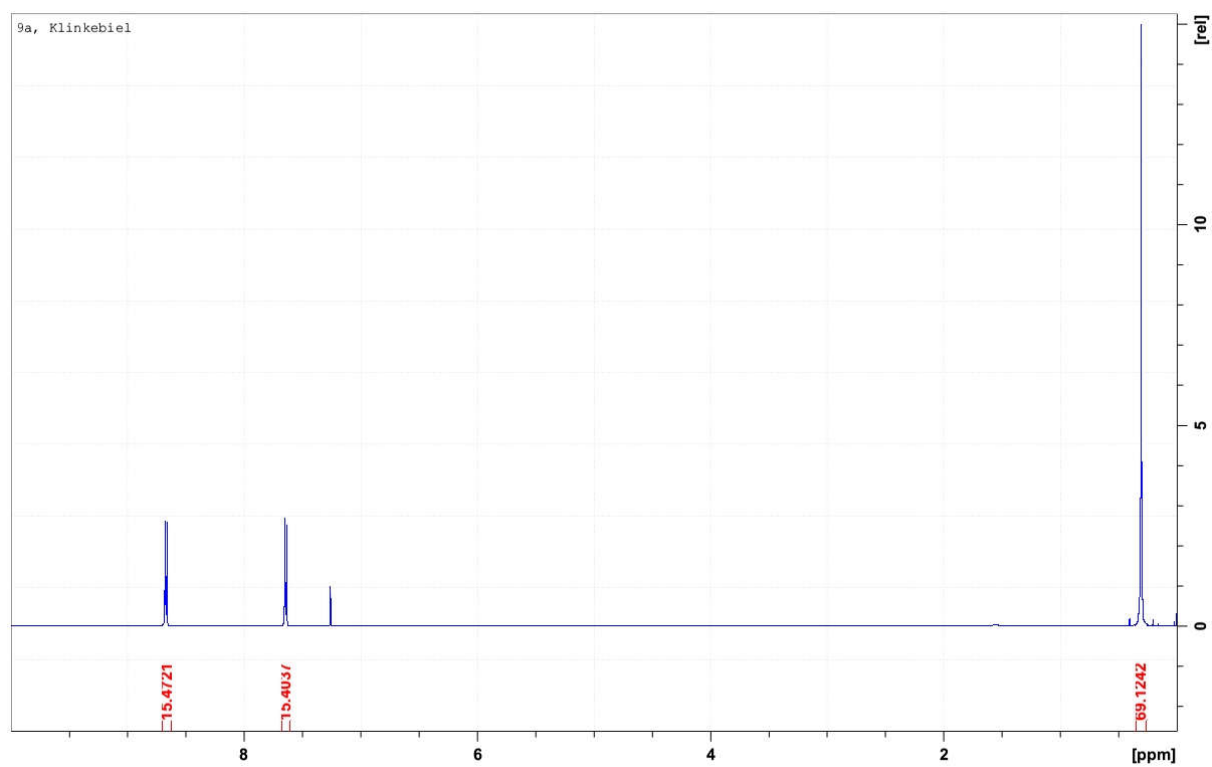

Figure S19. <sup>1</sup>H NMR spectrum of **9a**.

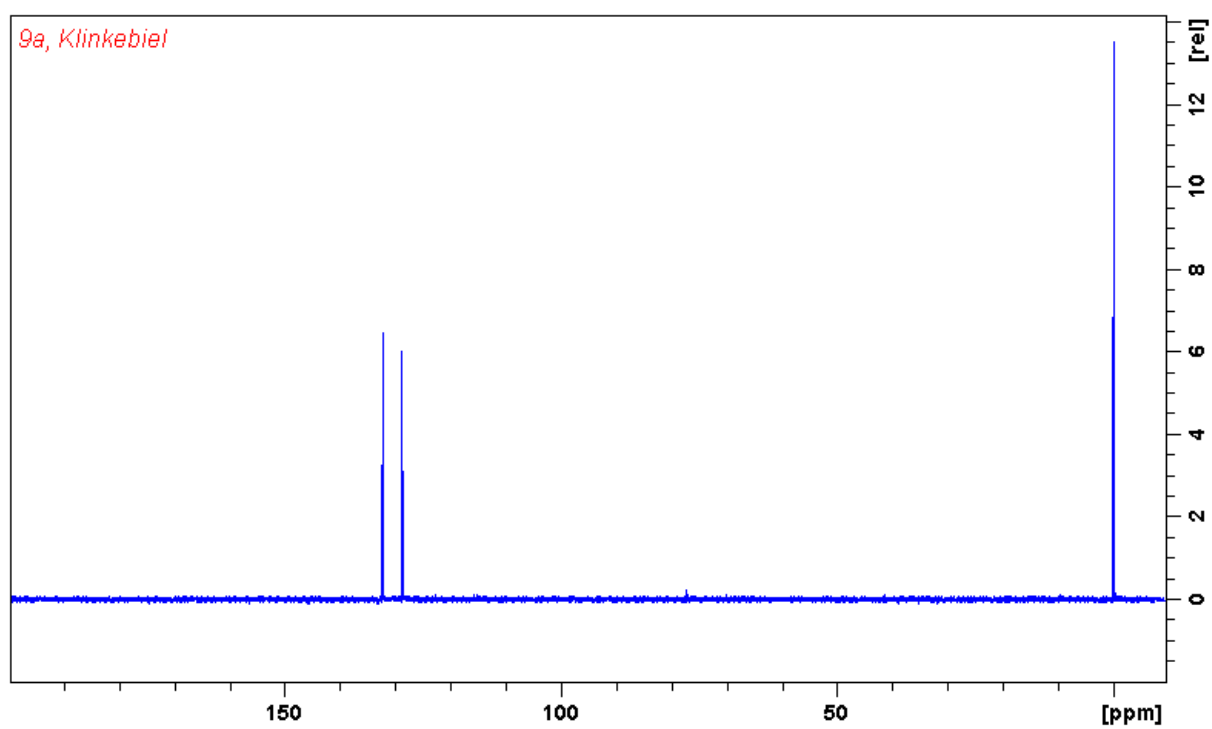

Figure S20. <sup>13</sup>C NMR spectrum of **9a**.

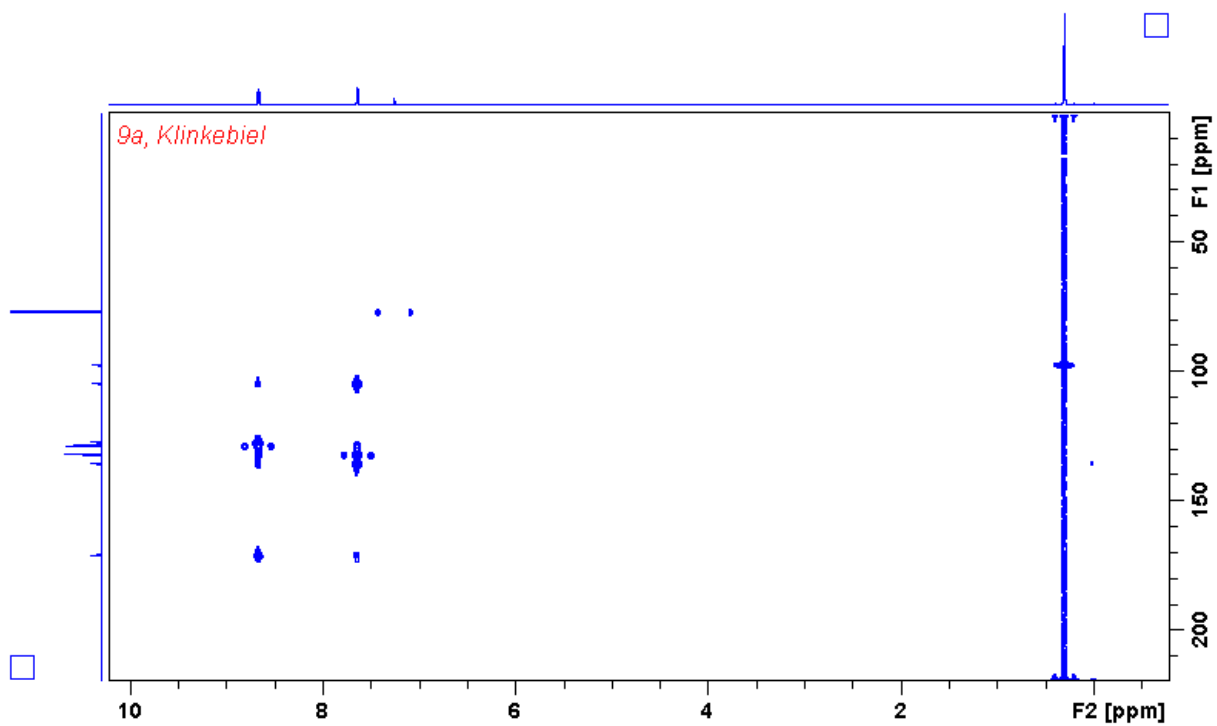

Figure S21. HMBC NMR spectrum of **9a**.

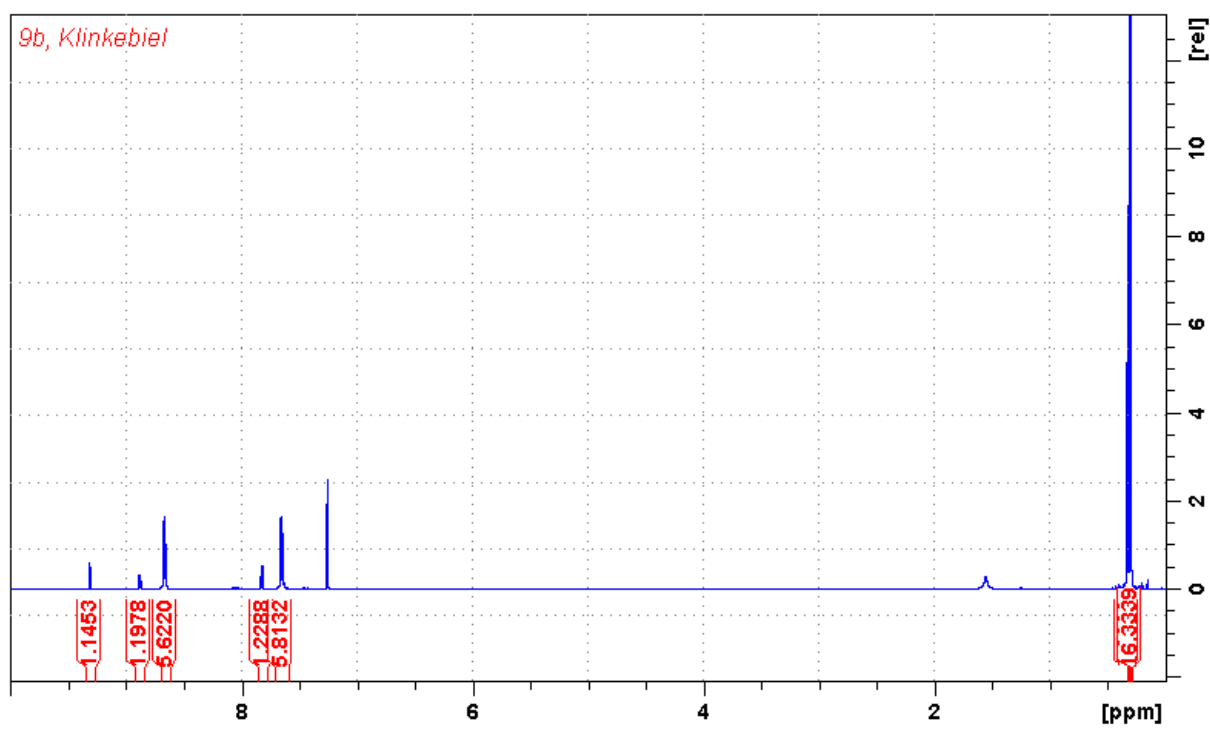

Figure S22. <sup>1</sup>H NMR spectrum of **9b**.

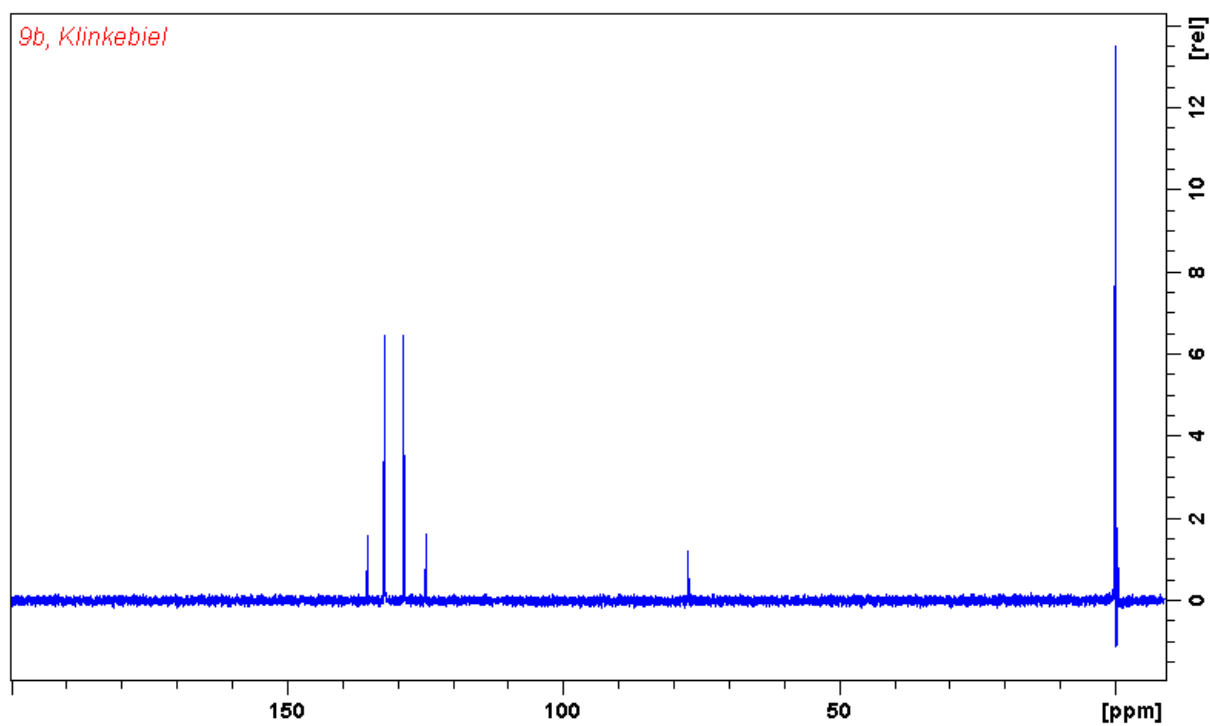

Figure S23. <sup>13</sup>C NMR spectrum of **9b**.



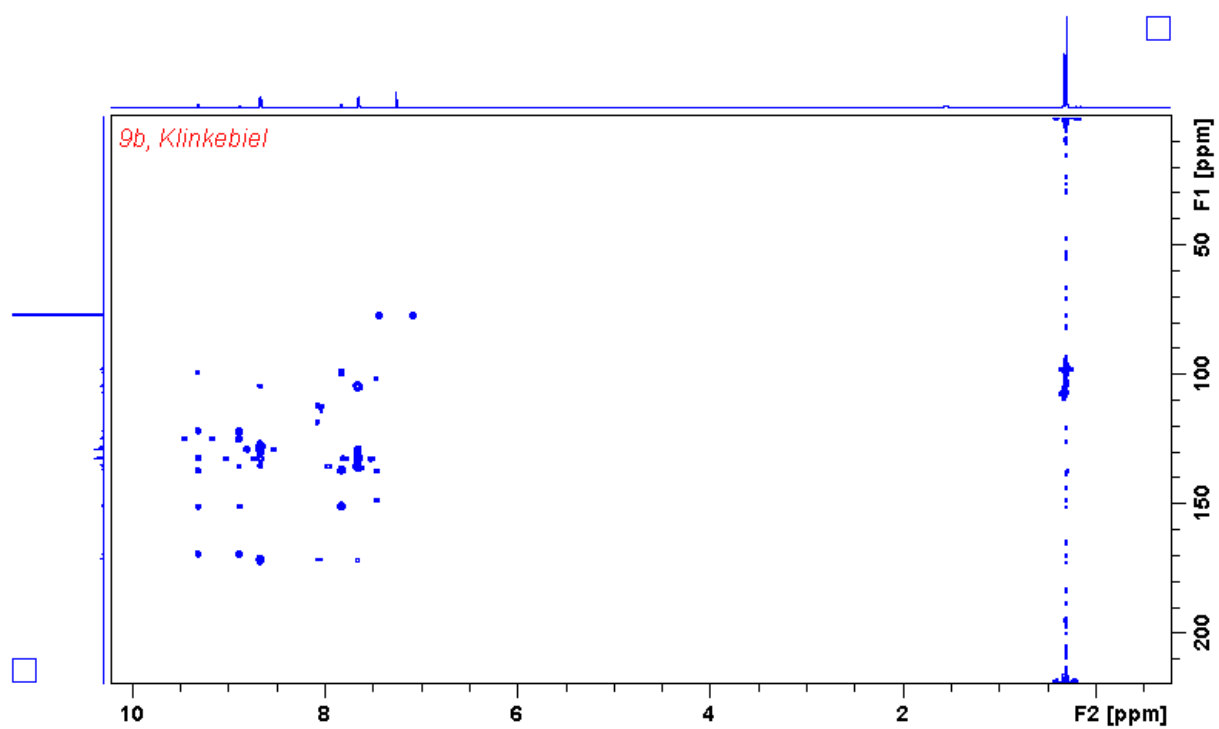

Figure S24. HMBC NMR spectrum of **9b**.



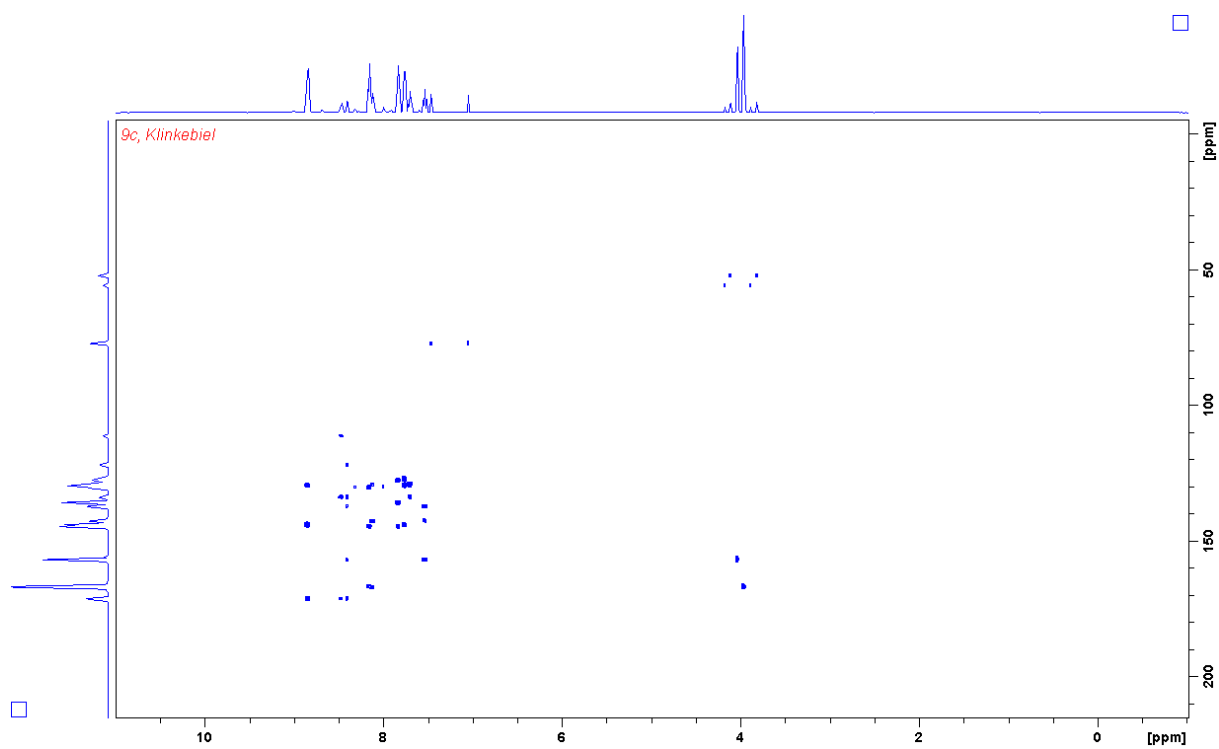

Figure S27. HMBC NMR spectrum of **9c**.

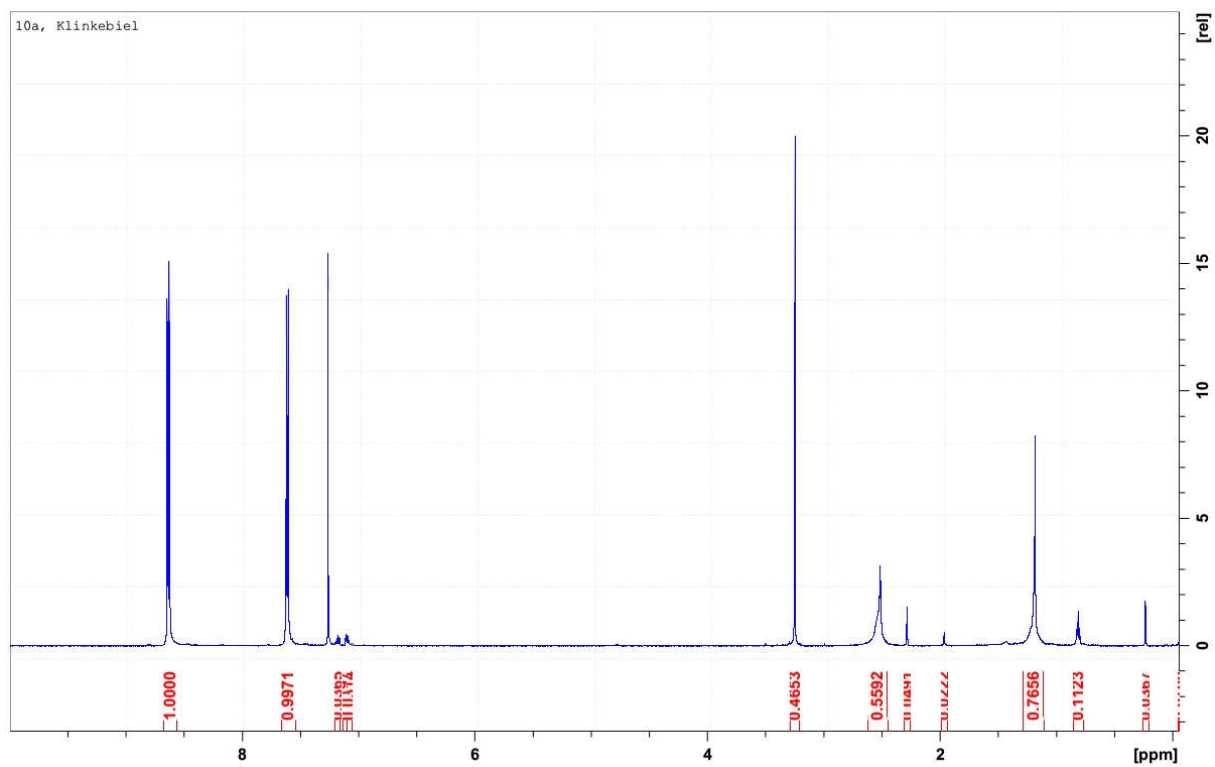

Figure S28.  $^1\text{H}$  NMR spectrum of **10a**.

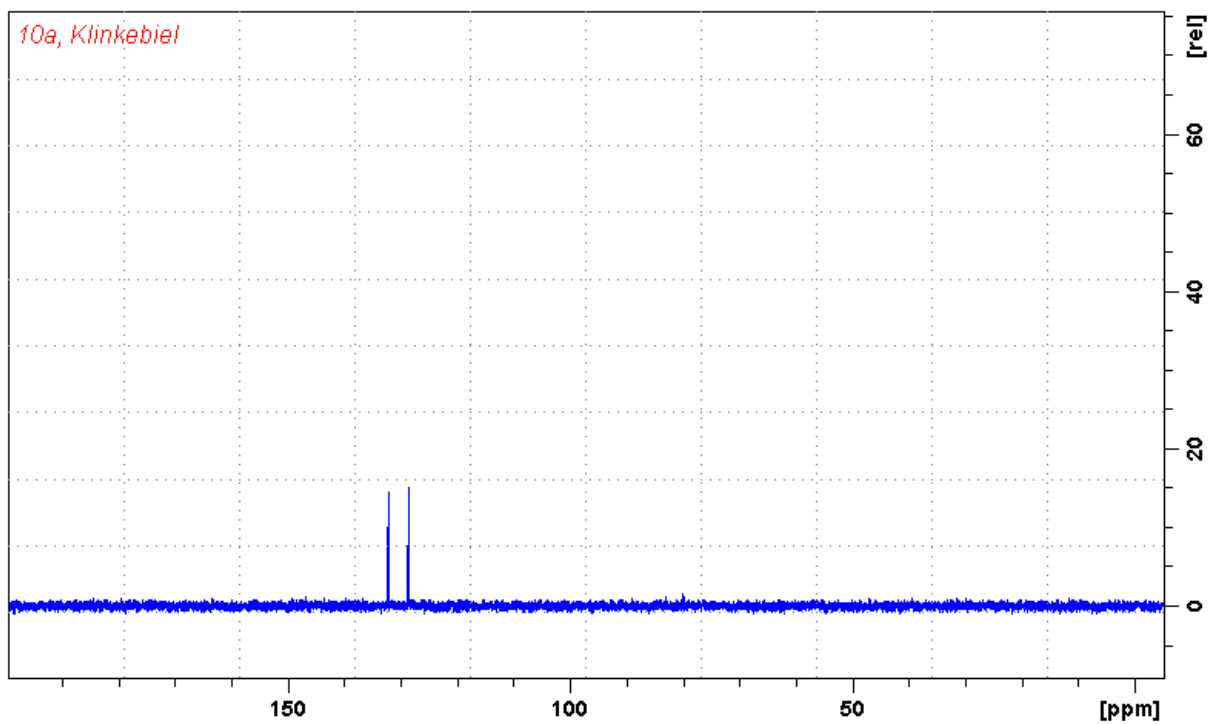

Figure S29.  $^{13}\text{C}$  NMR spectrum of **10a**.

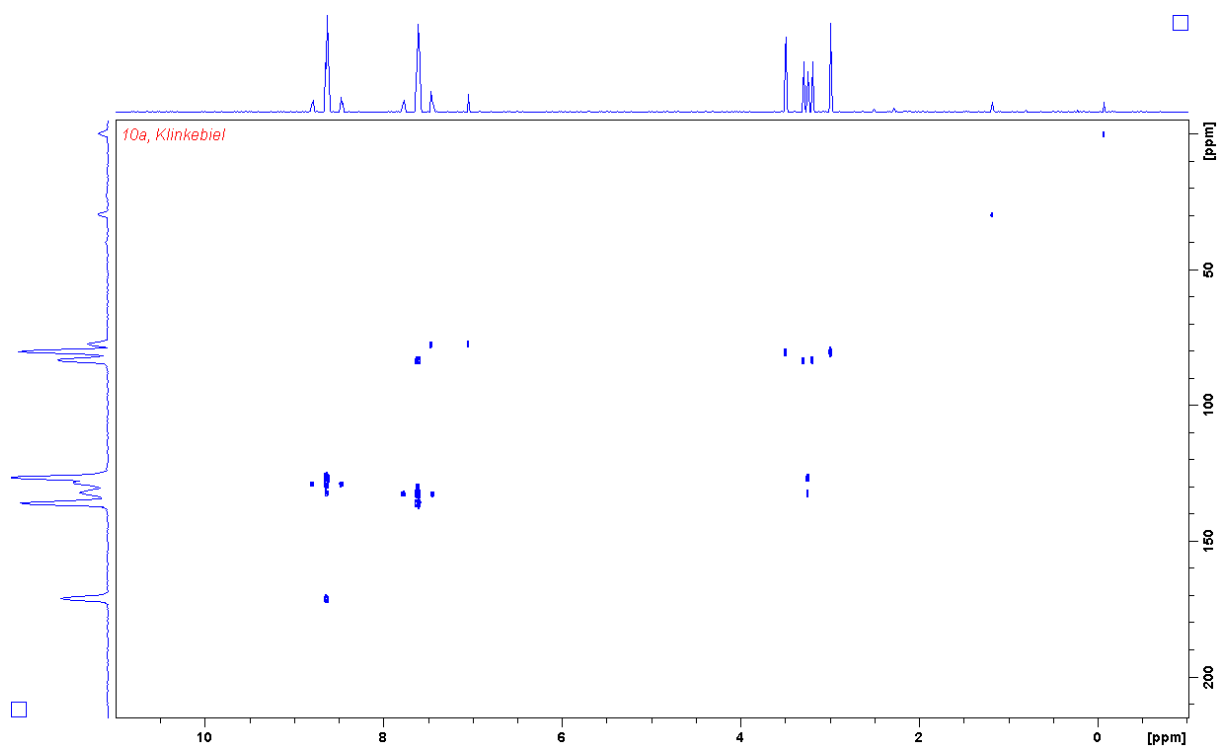

Figure S30. HMBC NMR spectrum of **10a**.

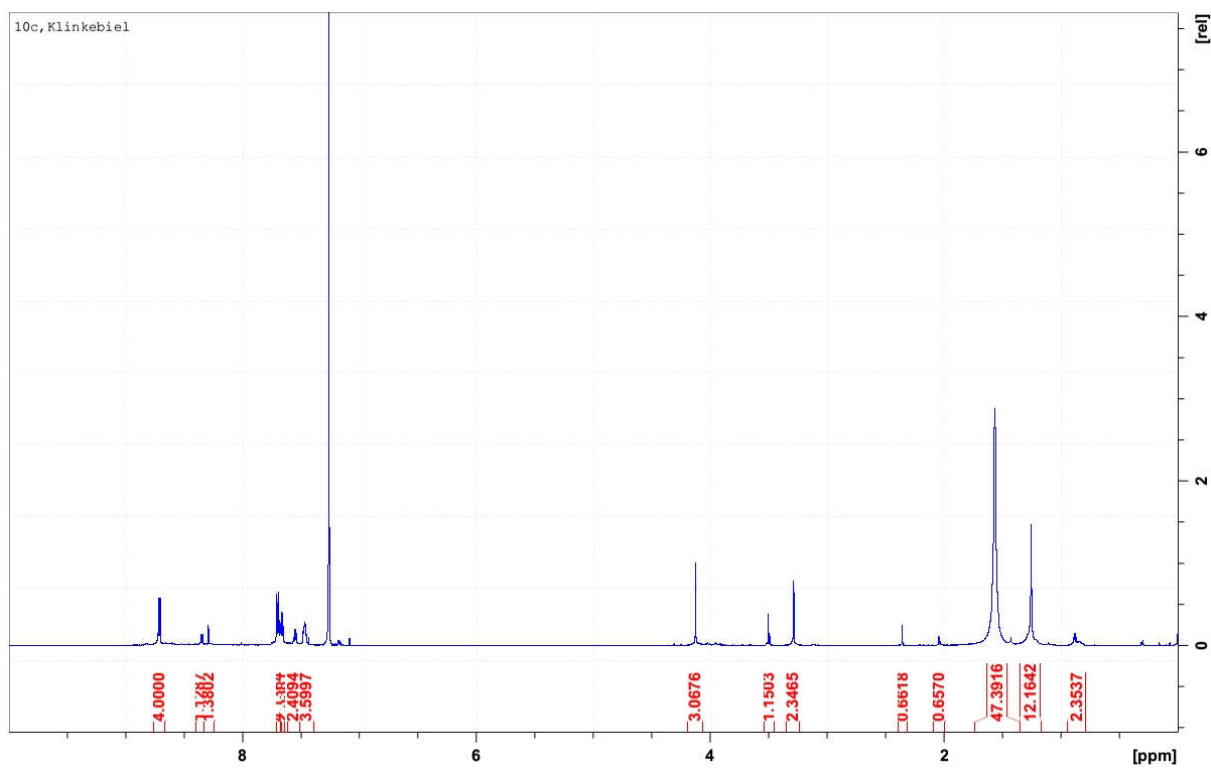

Figure S31.  $^1\text{H}$  NMR spectrum of **10c**.

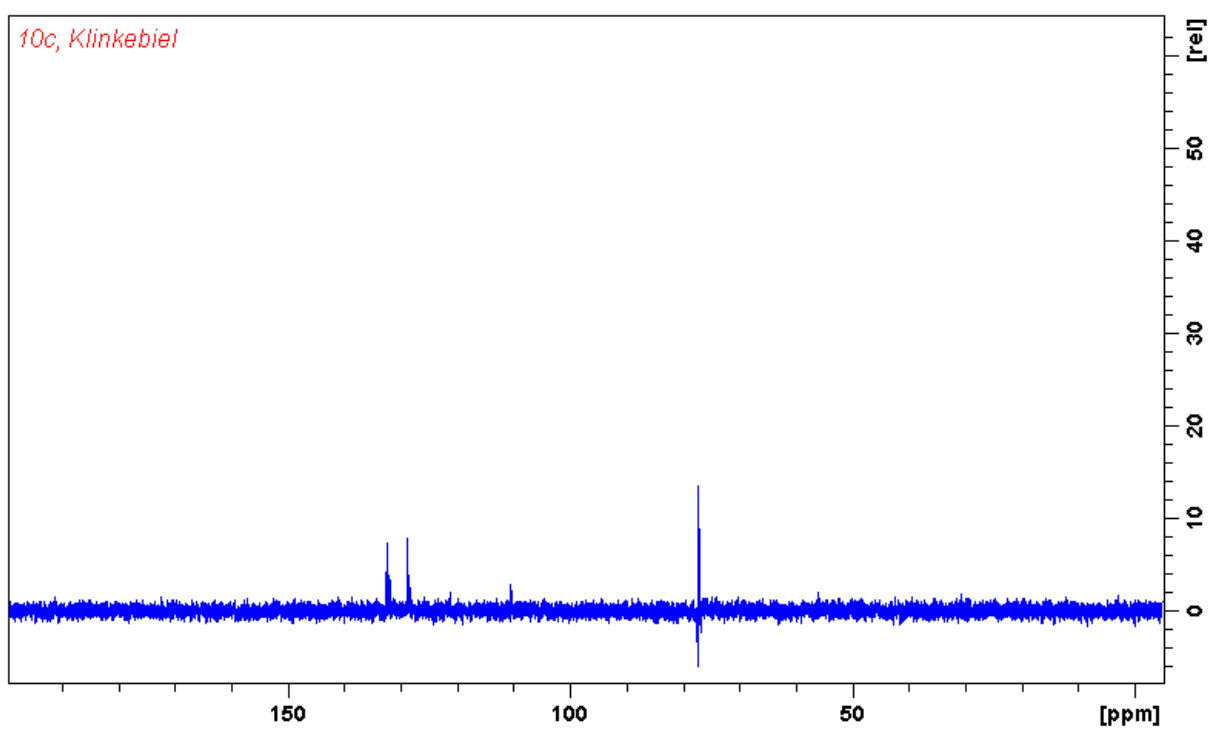

Figure S32.  $^{13}\text{C}$  NMR spectrum of **10c**.

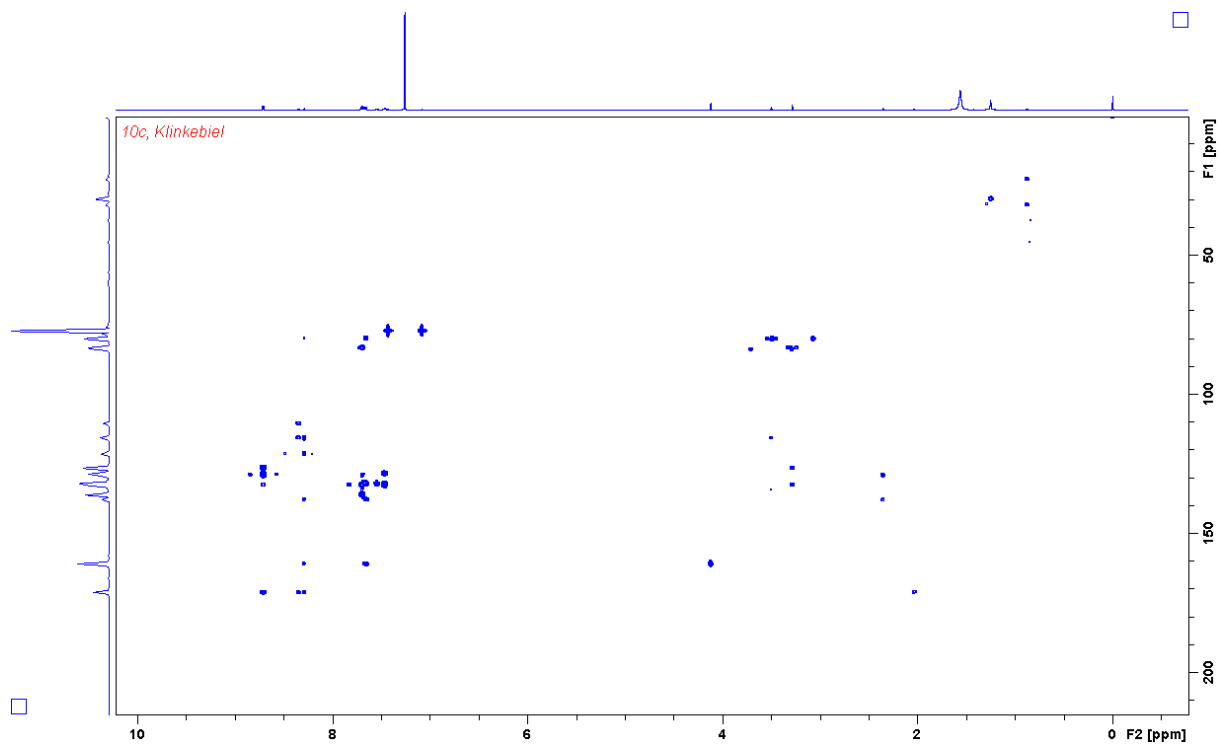

Figure S33. HMBC NMR spectrum of **10c**.

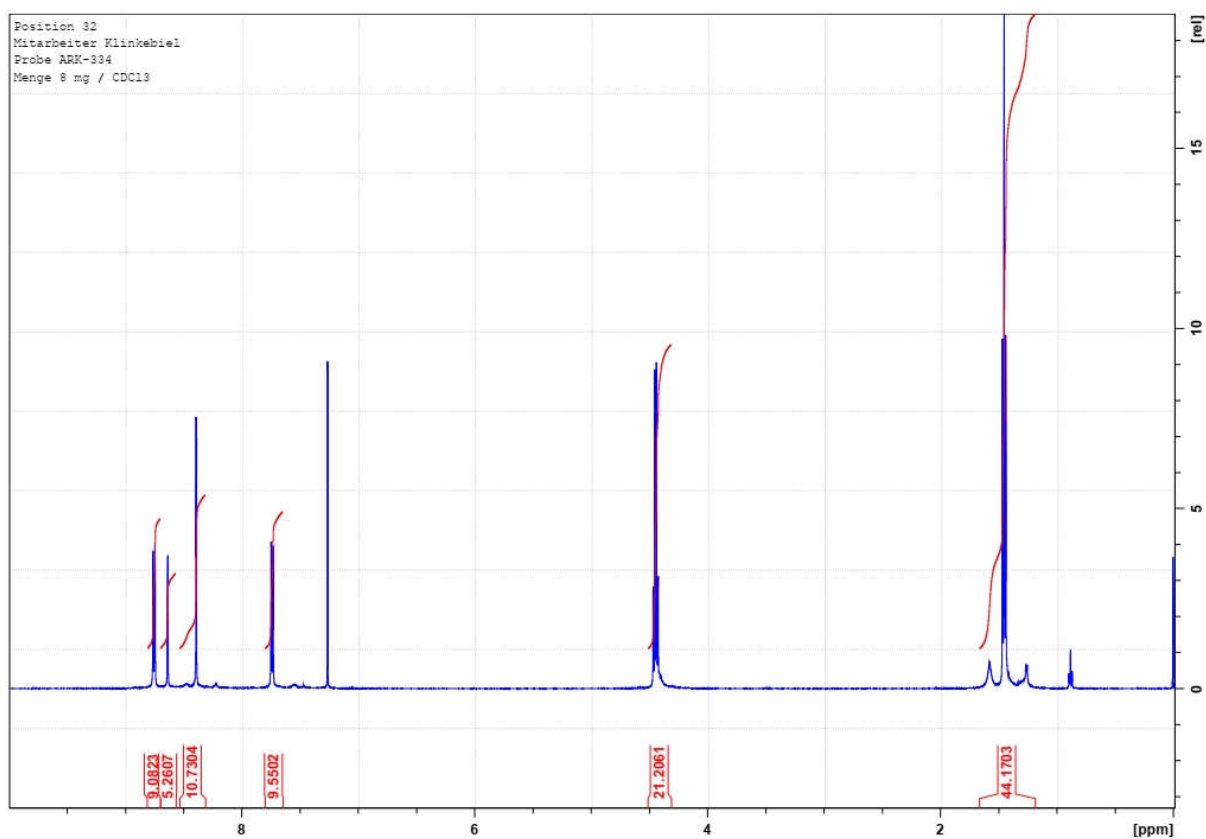

Figure S34. <sup>1</sup>H NMR spectrum of **11a**.

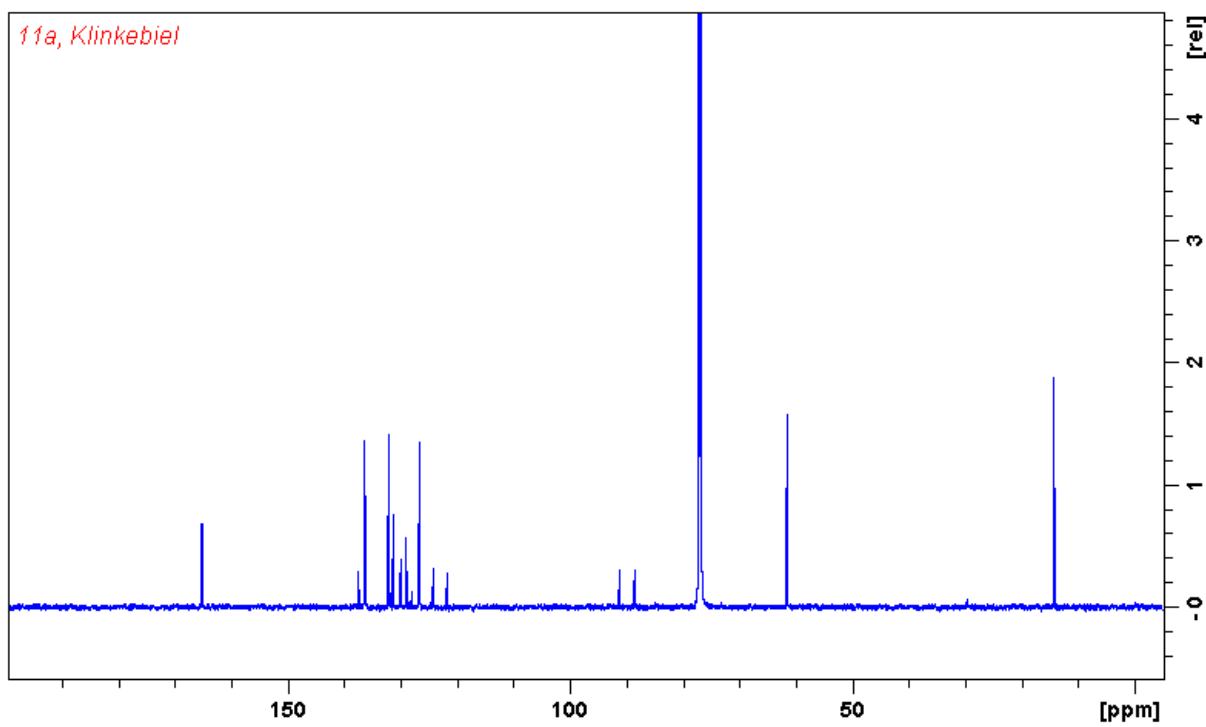

Figure S35. <sup>13</sup>C NMR spectrum of **11a**.



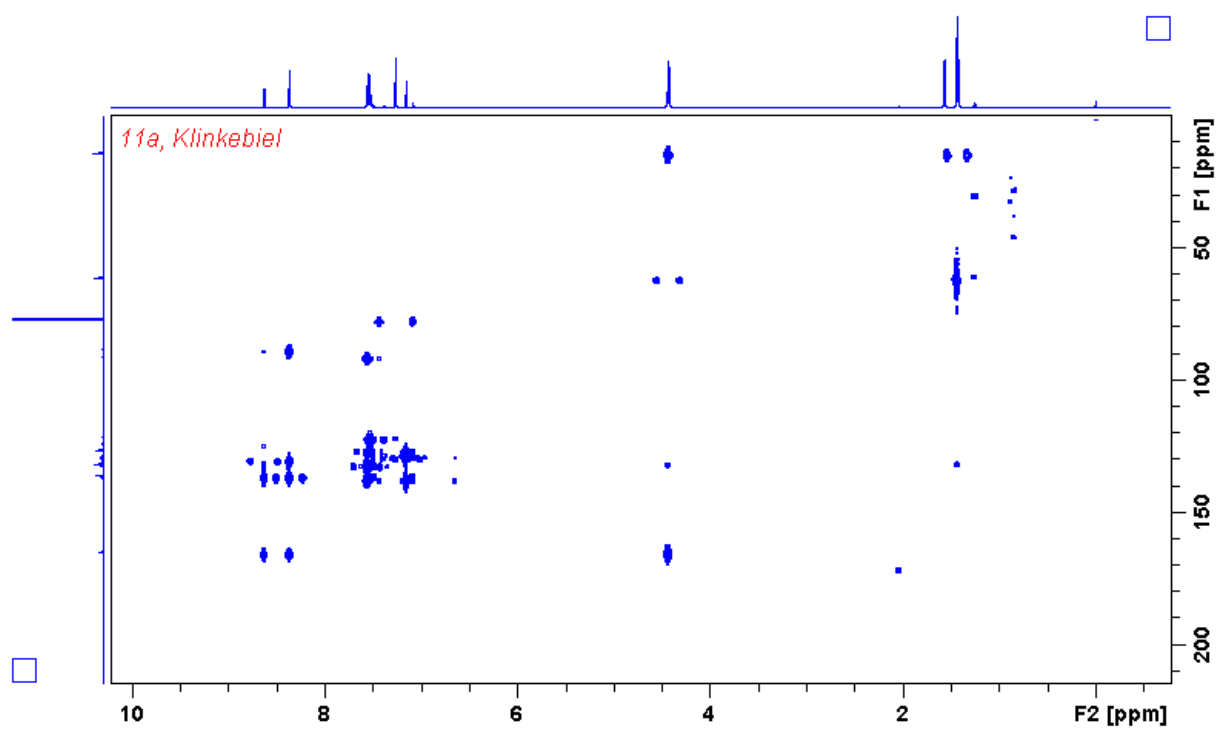

Figure S36. HMBC NMR spectrum of **11a**.

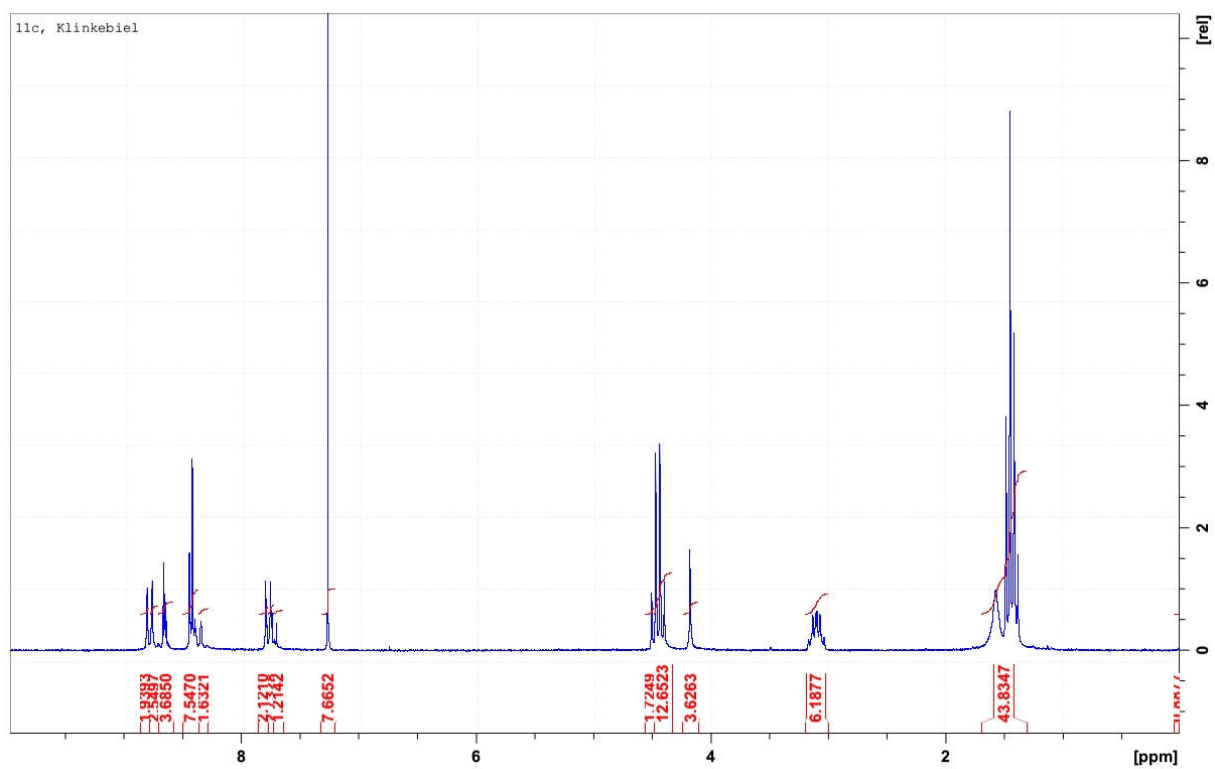

Figure S37. <sup>1</sup>H NMR spectrum of **11c**.

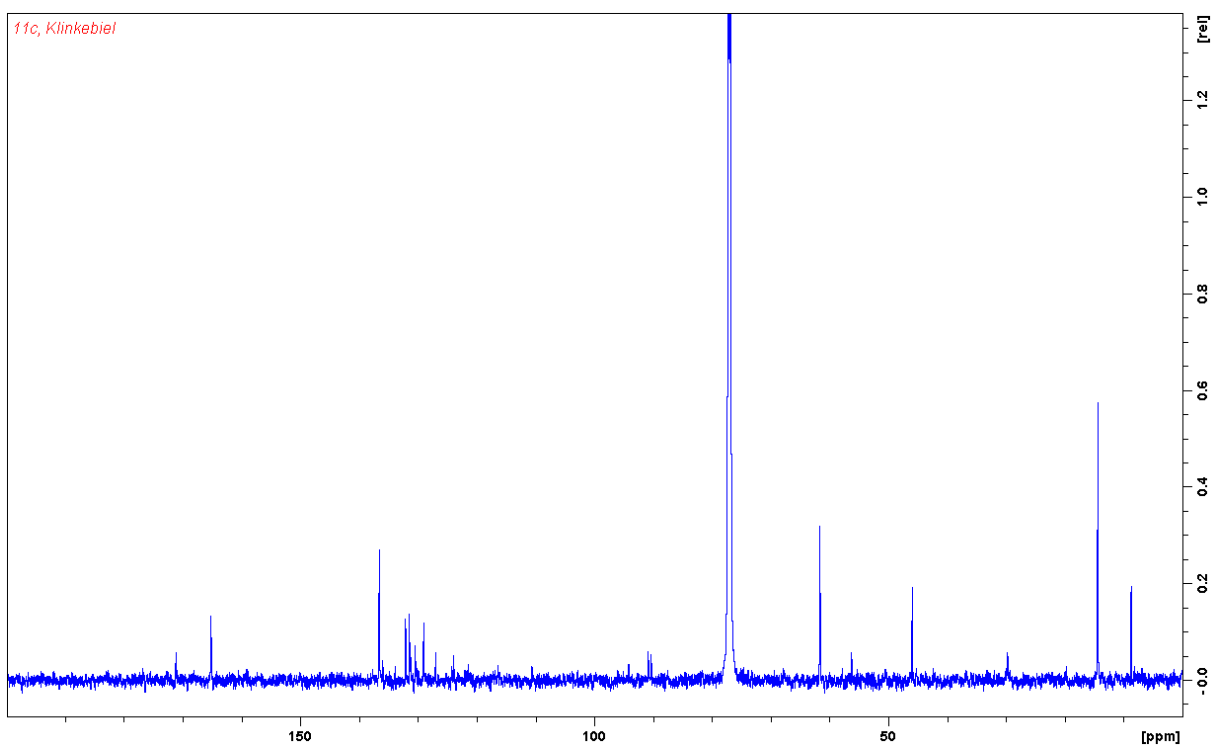

Figure S38. <sup>13</sup>C NMR spectrum of **11c**.

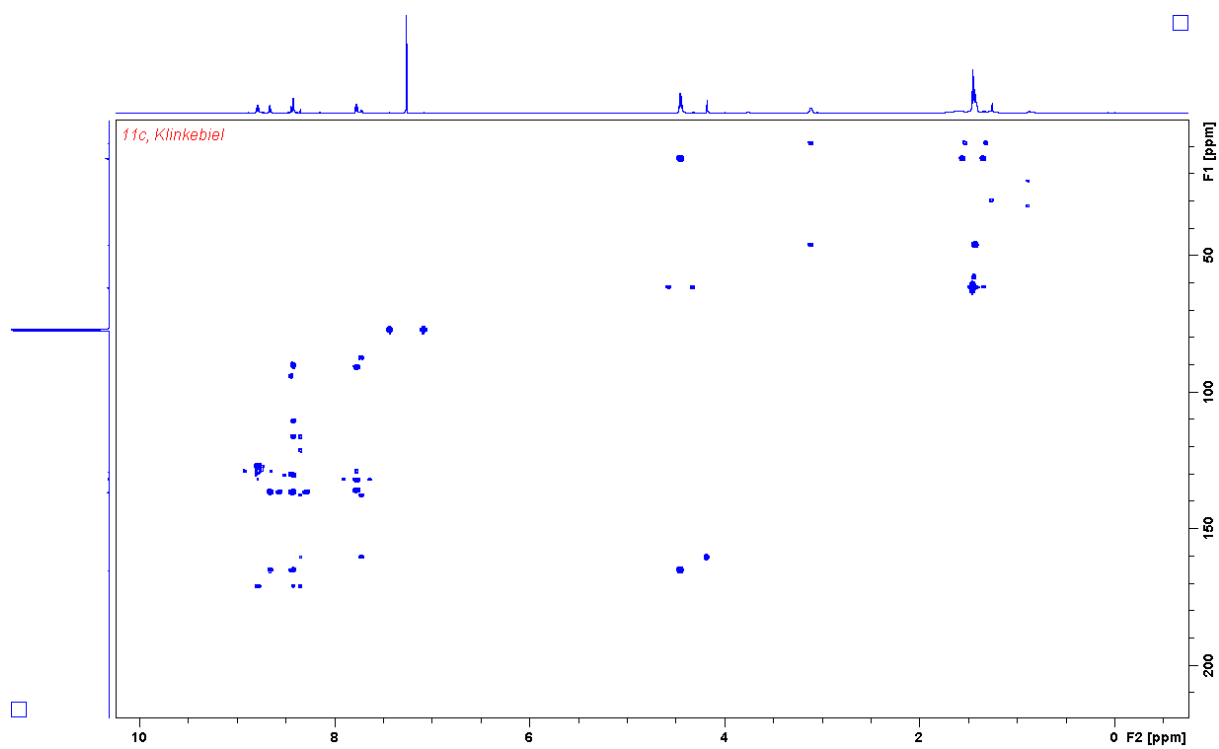

Figure S39. HMBC NMR spectrum of **11c**.
